# Supplementary material for: CStreet: a computed Cell State trajectory inference method for time-series single-cell RNA sequencing data
Source: Oxford University Press journal article supplement (doi:10.1093/bioinformatics/btab488), 2021-06-30
Supplement: btab488_supplementary_data.zip [file btab488_supplementary_data.zip]

Archive with 8 entries (8 files):
- FigS1.pdf
- FigS2.pdf
- FigS3.pdf
- FigS4.pdf
- FigS5.pdf
- FigS6.pdf
- FigS7.pdf
- Supplementary_File.docx
