# Supplementary material for: CStreet: a computed Cell State trajectory inference method for time-series single-cell RNA sequencing data
Source: Oxford University Press journal article supplement (doi:10.1093/bioinformatics/btab488), 2021-06-30
Supplement: btab488_supplementary_data.zip [file btab488_supplementary_data.zip › Supplementary_File.docx]

­­­Supplementary information

**CStreet: a computed Cell State trajectory inference method for time-series single-cell RNA sequencing data**

Chengchen Zhao1,+,*, Wenchao Xiu1,+, Yuwei Hua1,+, Naiqian Zhang2, Yong Zhang1,*

1Institute for Regenerative Medicine, Shanghai East Hospital, Shanghai Key Laboratory of Signaling and Disease Research, Frontier Science Center for Stem Cell Research, School of Life Science and Technology, Tongji University, Shanghai 200092, China

2School of Mathematics and Statistics, Shandong University at Weihai, Weihai 264209, China

*To whom correspondence should be addressed.

+The authors wish it to be known that in their opinion, the first three authors should be regarded as joint First Authors.

**CONTENTS**

1 Supplementary Figures

**Supplementary Figures**

**
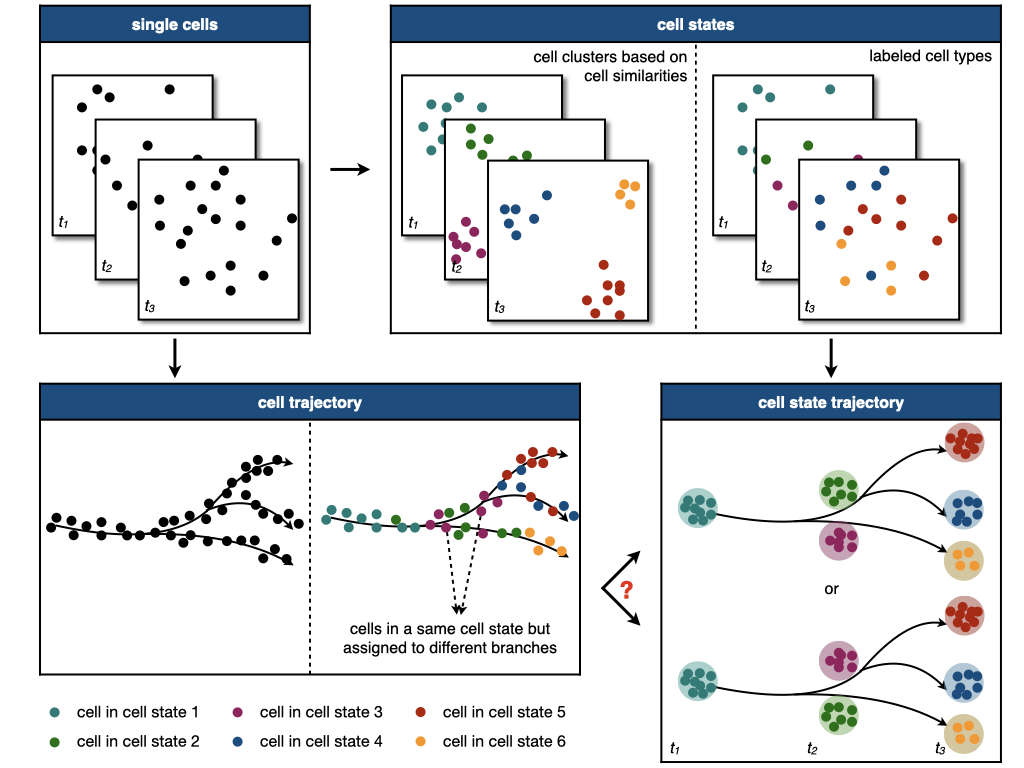
**

**Fig. S1**. **Schematic diagram of cell trajectories and cell state trajectory.** For a time-series scRNA-seq dataset, the cell states are recognized as cell clusters based on the cell similarities or inputted labeled cell types. Using the cell trajectory inference method, cell trajectory with different branches can be constructed. In this trajectory, cells in the same cell state may be assigned to different branches, leading to the difficulty about the determination of the relationship between this cell states and the others. Thus, an accurate cell state trajectory inference method is needed.

**
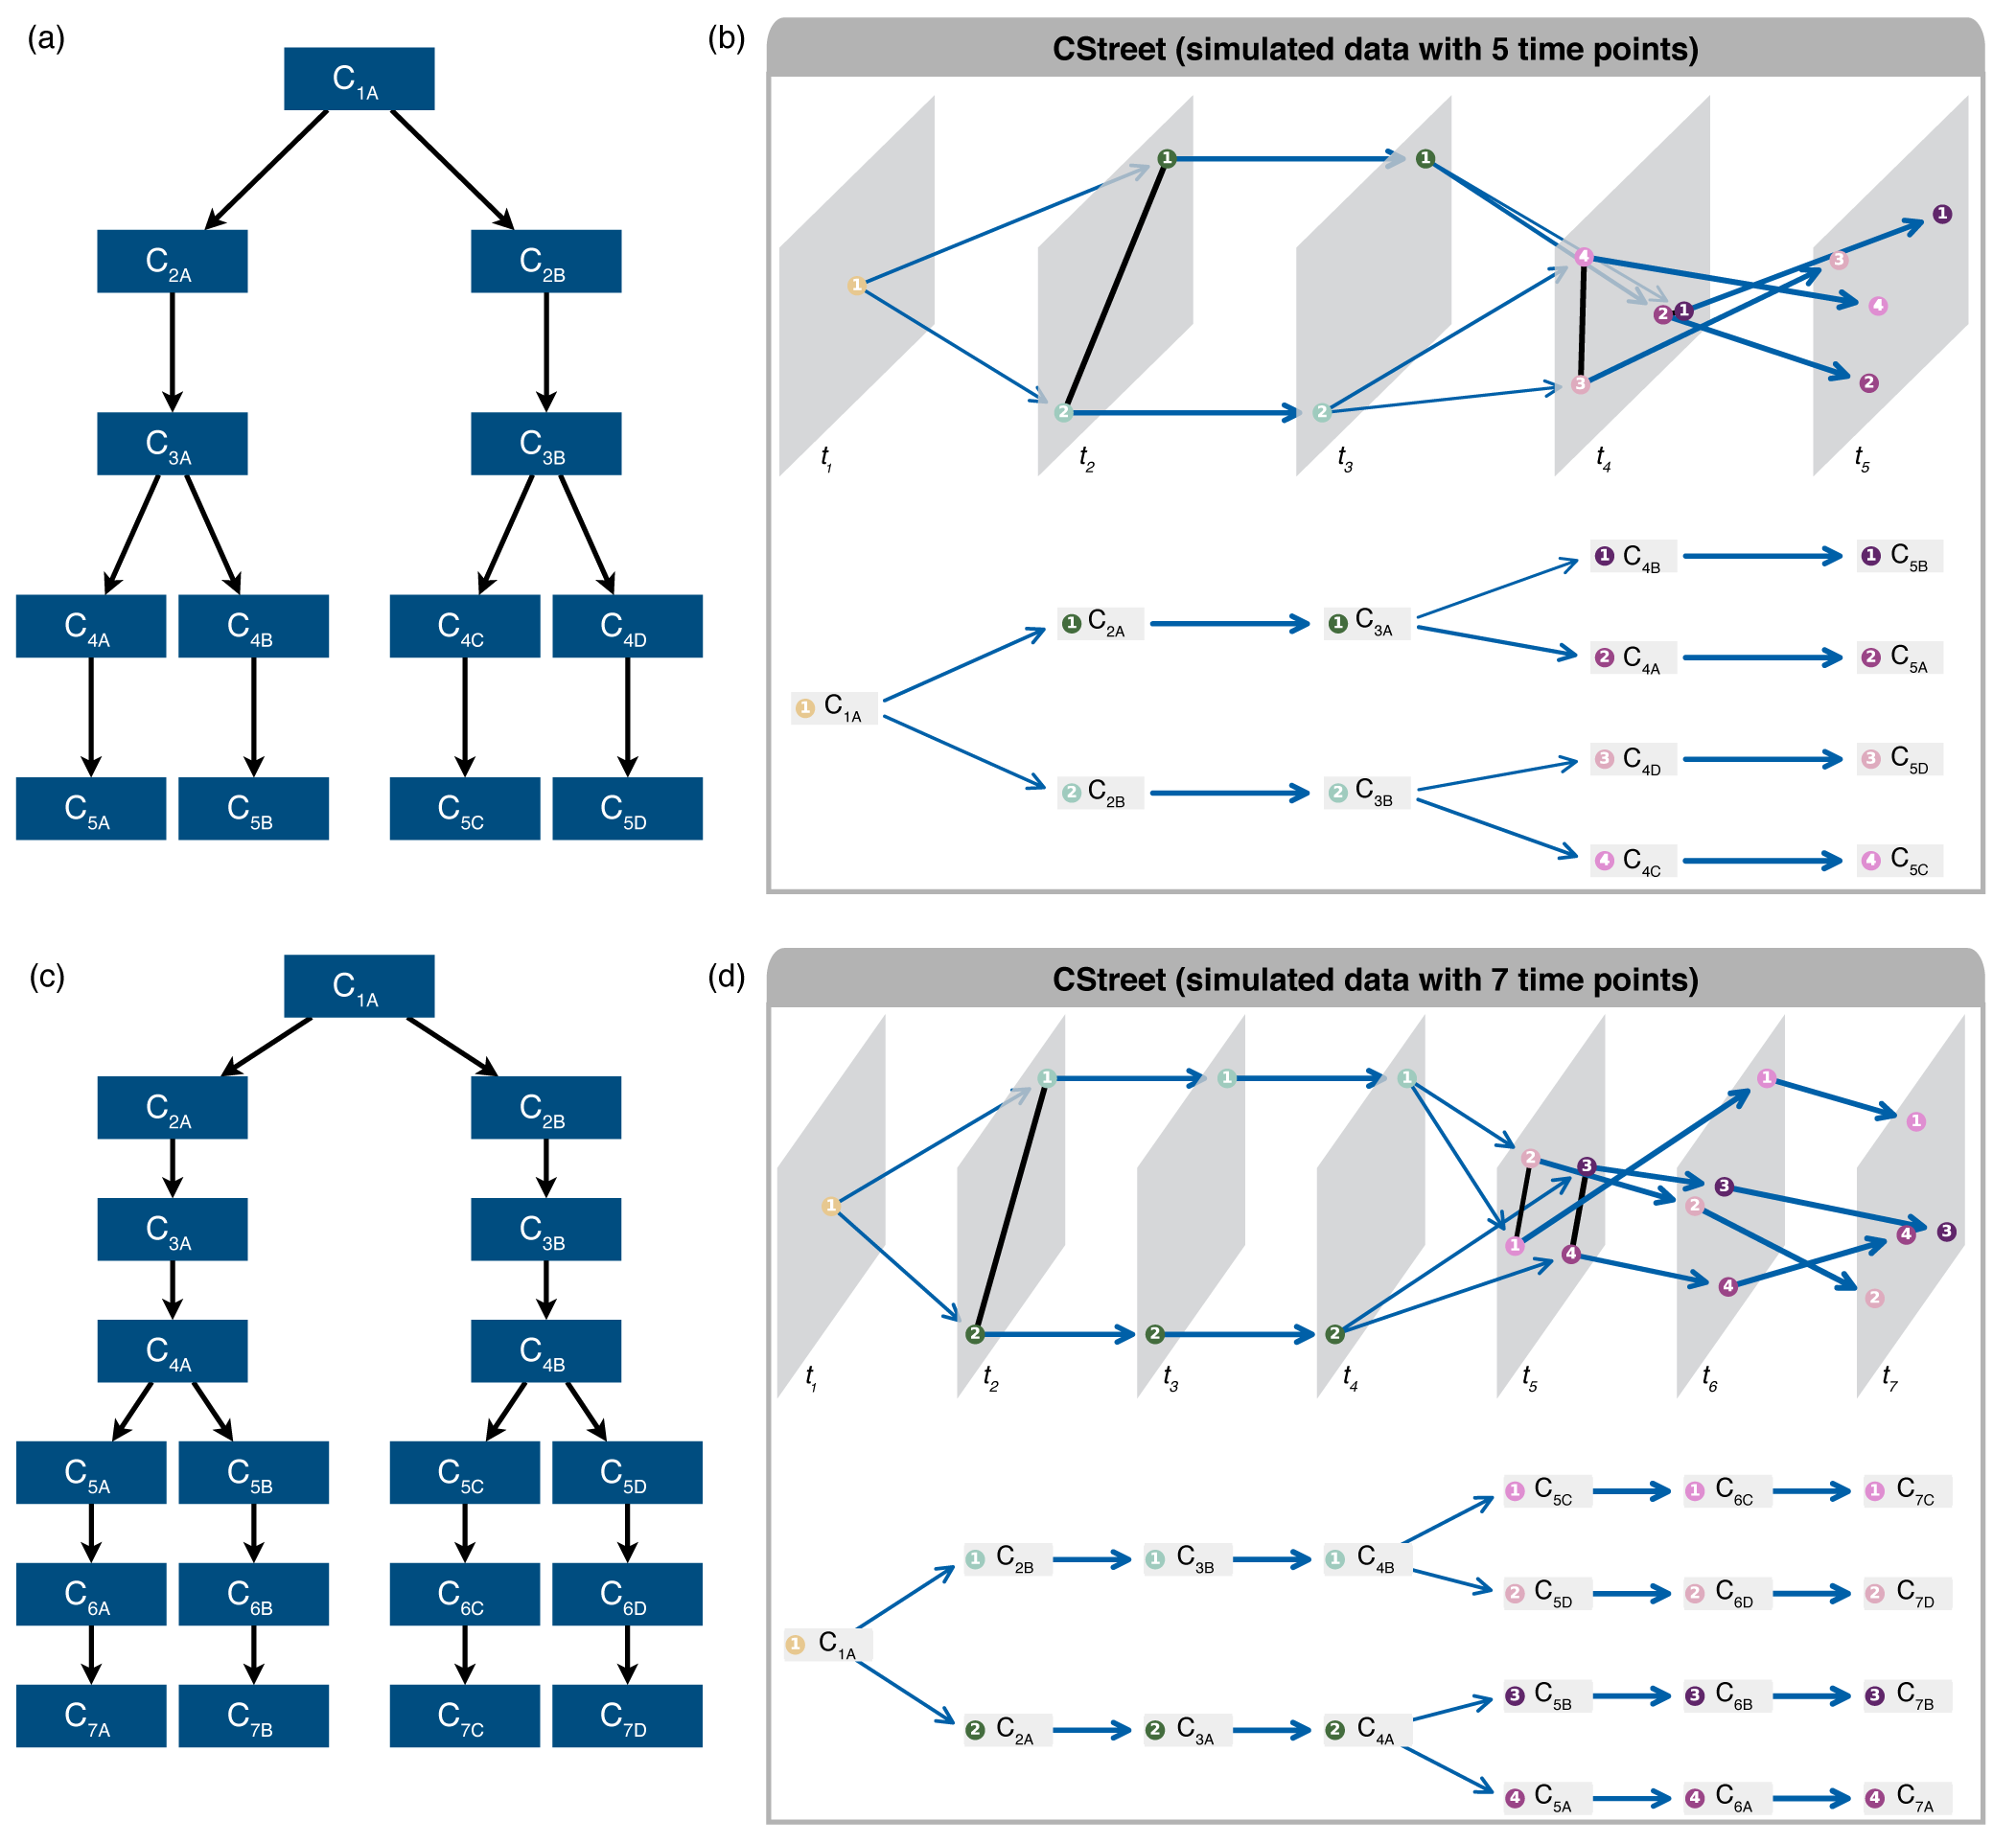
**

**Fig. S2. Performance of CStreet on the simulated datasets with different sampling densities (i.e. different sampling times on the same paths).**

**(a)** The real trajectory of the simulation data with 5 time points used to evaluate the accuracy of the inferred trajectories.

**(b)** The inferred cell state trajectory of the simulation data with 5 time points using CStreet.

**(c)** The real trajectory of the simulation data with 7 time points used to evaluate the accuracy of the inferred trajectories.

**(d)** The inferred cell state trajectory of the simulation data with 7 time points using CStreet.

**
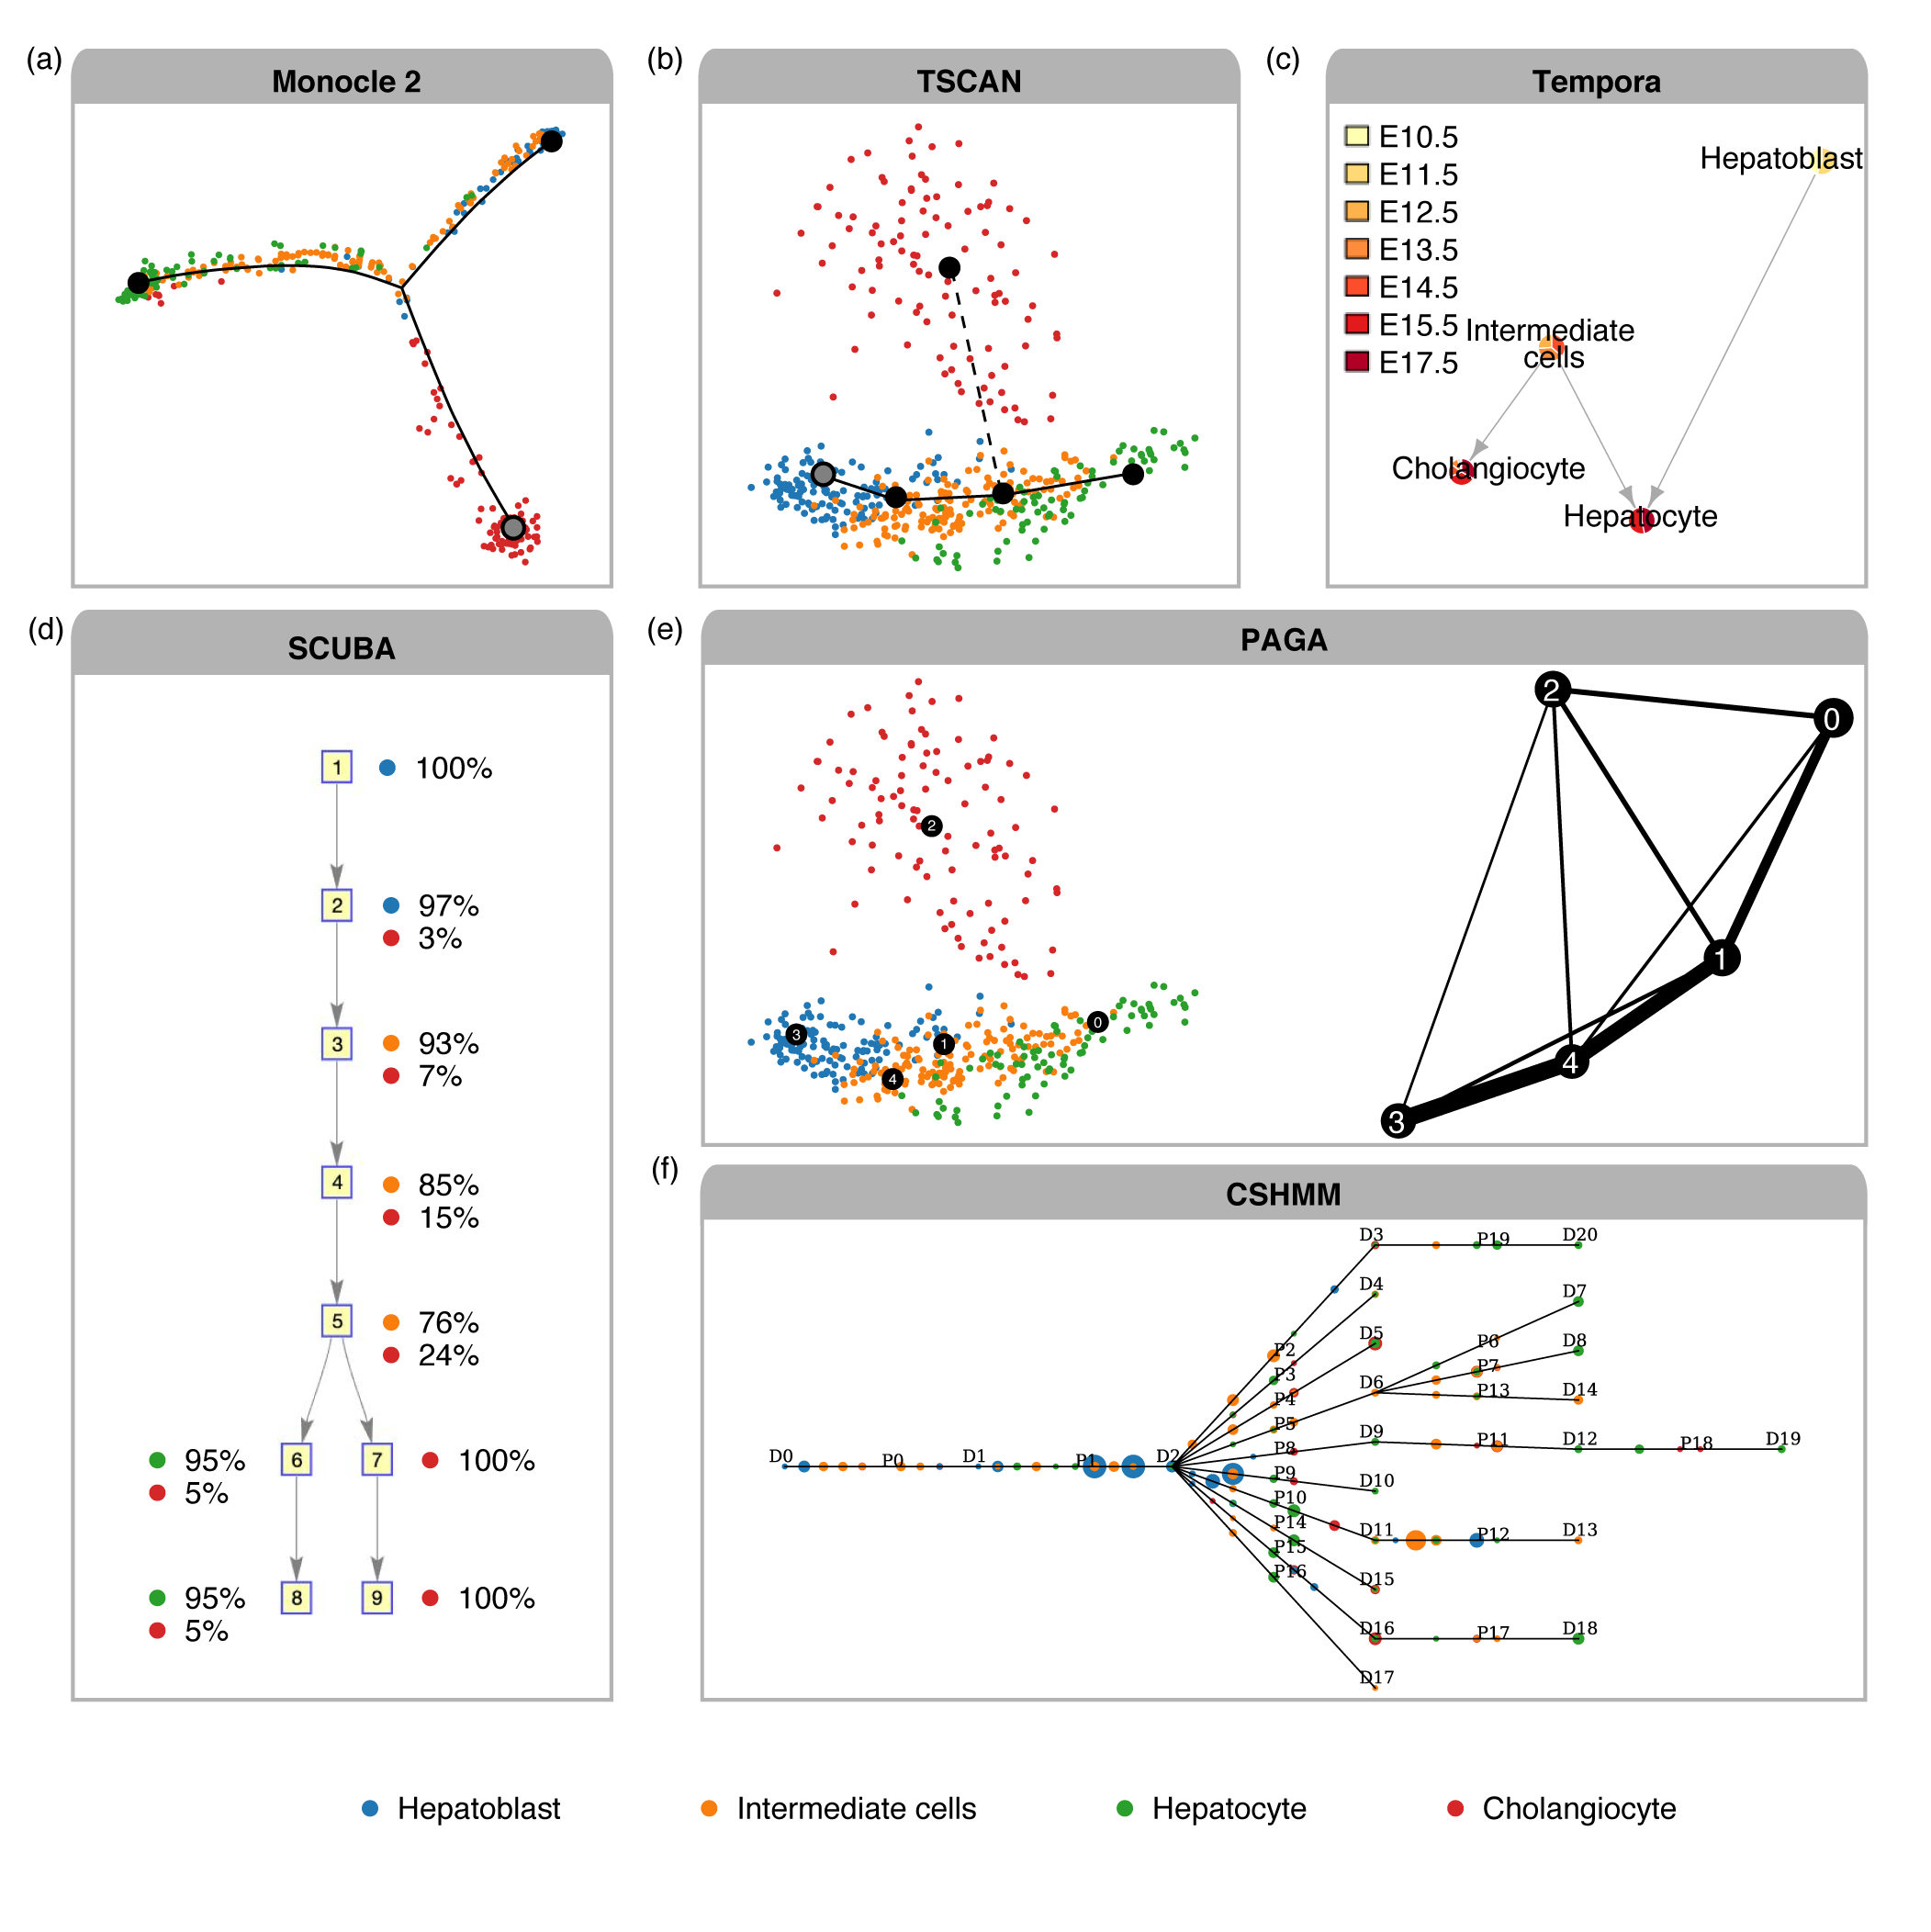
**

**Fig. S3. Performance of Monocle2, TSCAN, Tempora, SCUBA, PAGA, and CSHMM on the time-series scRNA-seq data during mouse hepatoblast differentiation using the label strategy of intermediate cells (HDTSD 1).**

**(a-f)** The inferred cell state trajectory of HDTSD 1 using Monocle2 (a), TSCAN (b), Tempora (c), SCUBA (d), PAGA (e), and CSHMM (f). The black dots in (a), (b), and (e) represent the center of cell states and the gray dots in (a) and (b) represent the starts of trajectories. The black edges represent the connections of these centers. The thickness of edges in (e) represent the statistical measure of the connectivity between cell states. In (d), cell types and proportions contained in each cluster was labeled. In (f), each path represents a set of infinite states, each node represents the location where paths split, and each intermediate circle represents a cell state on the path. The circle sizes represent the numbers of cells assigned to the cell state. The cells are colored according to their true state.

**
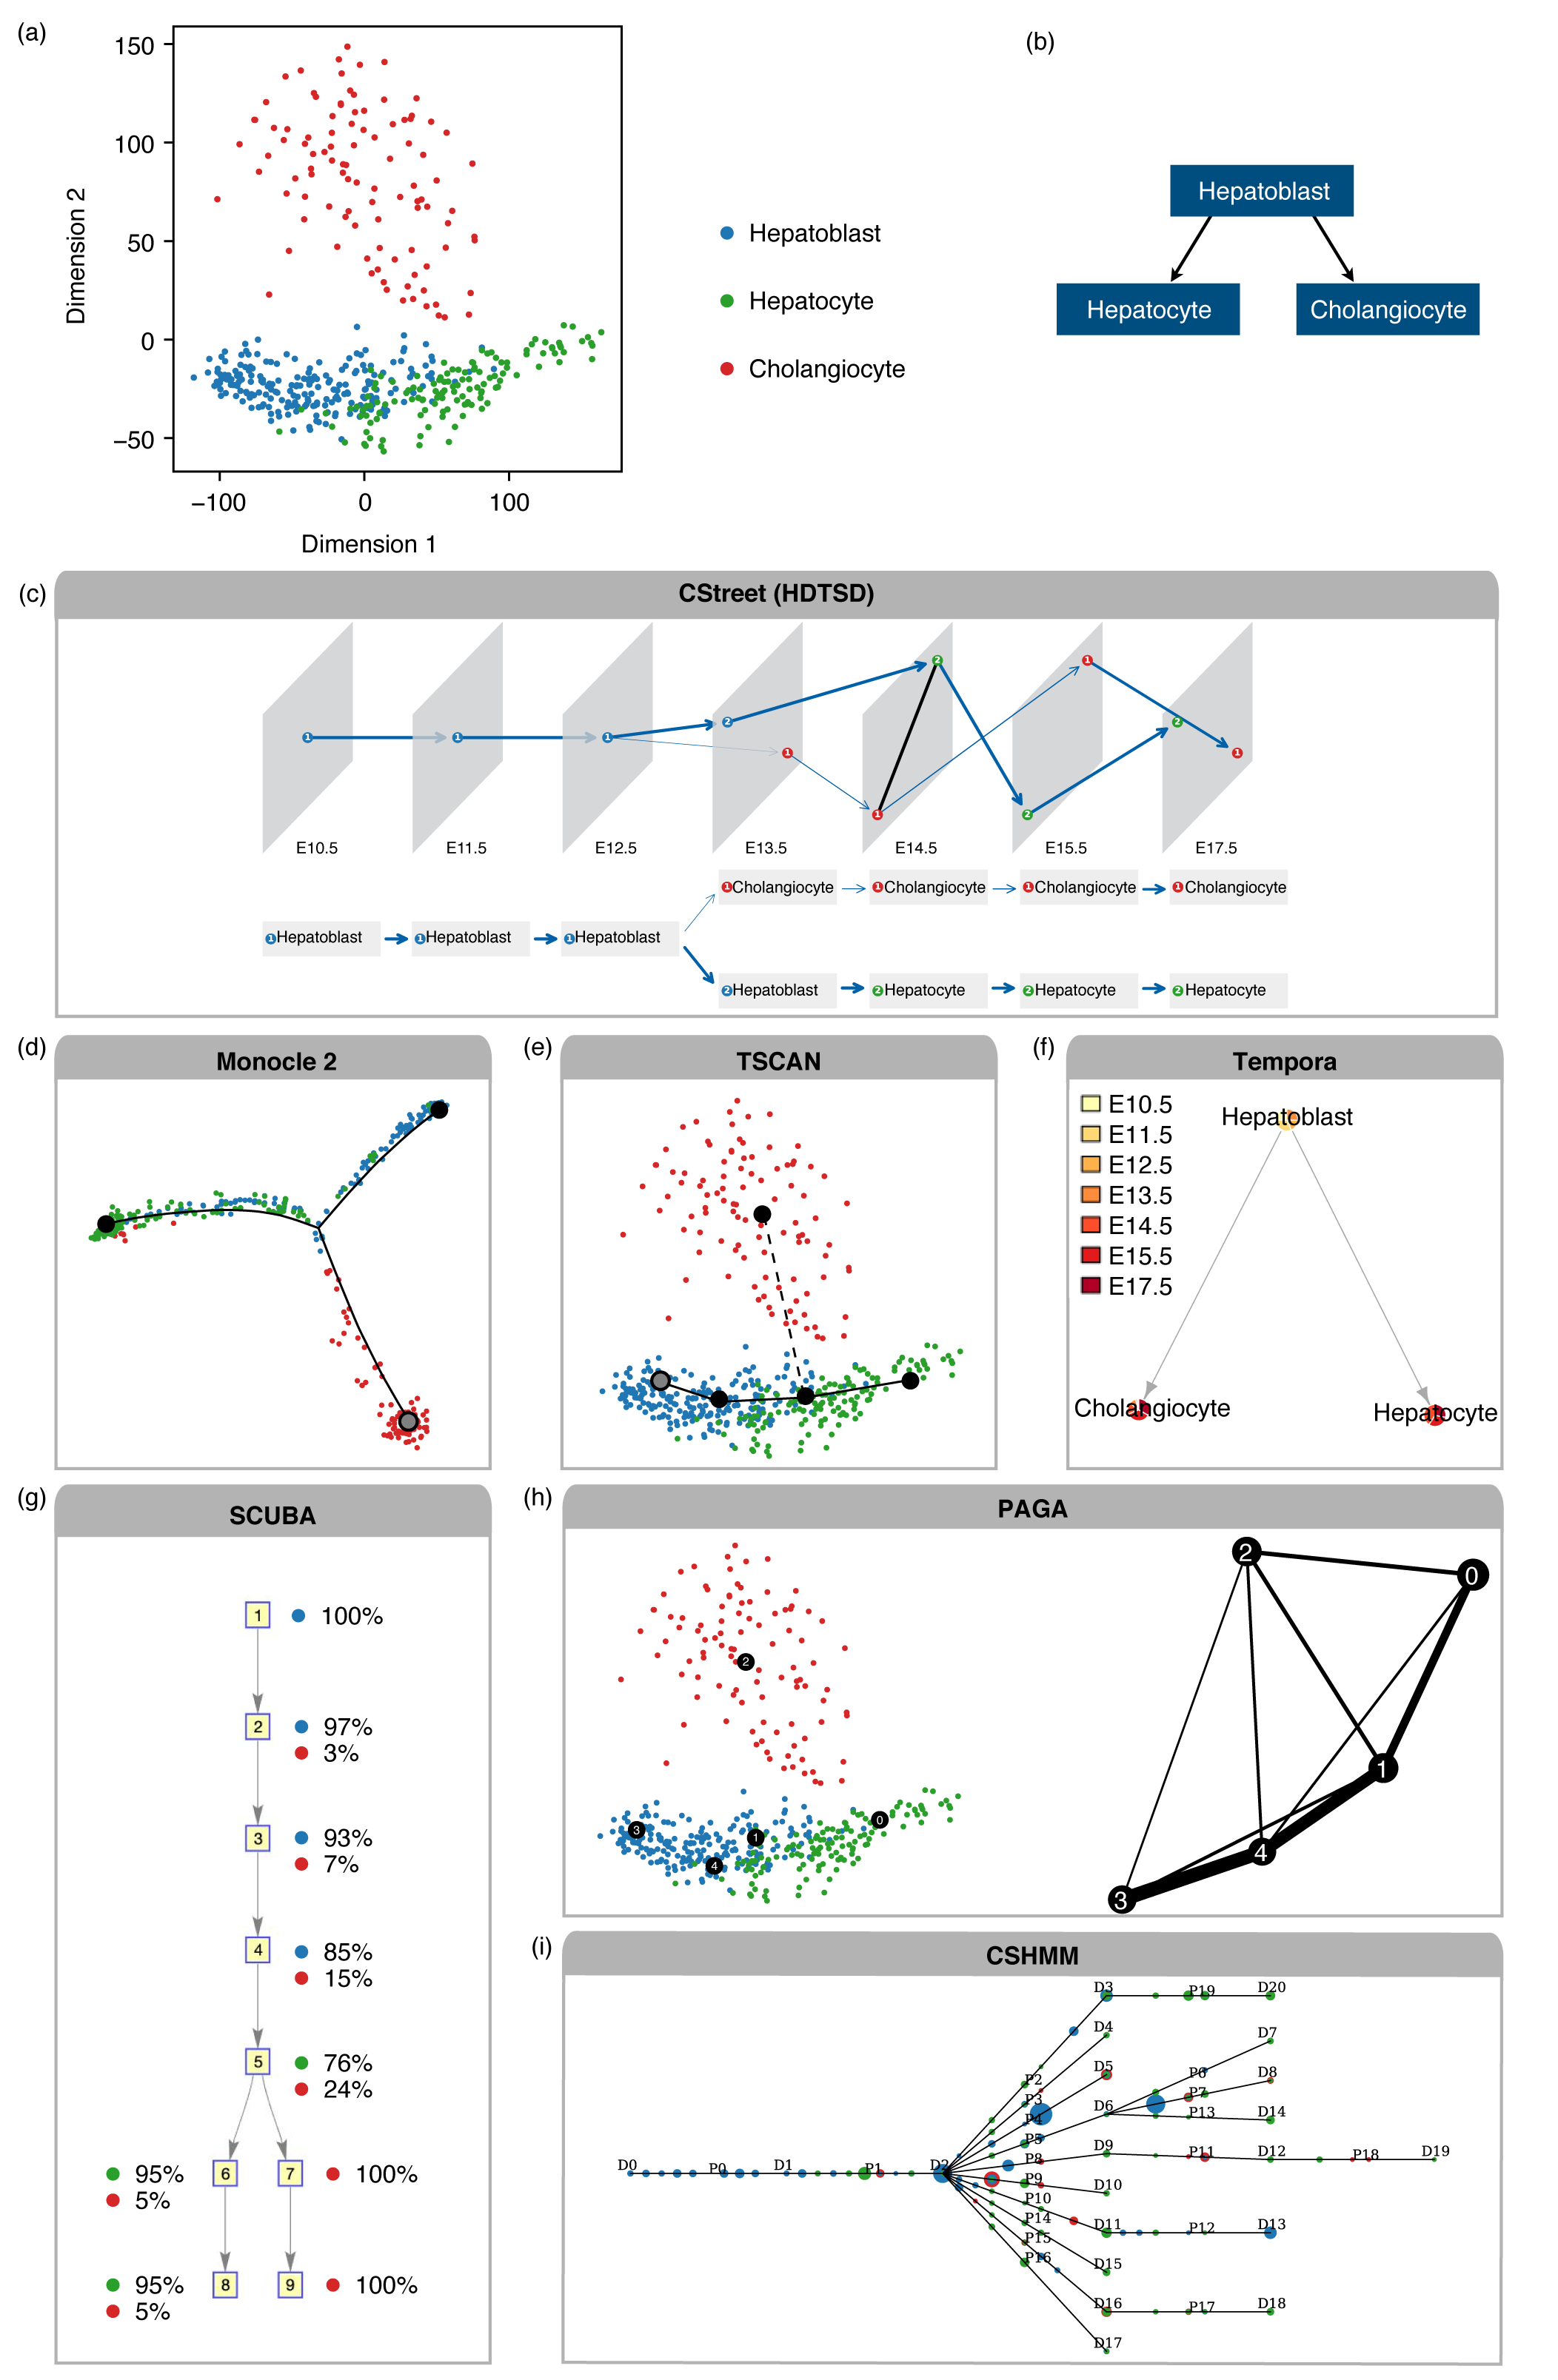
**

**Fig. S4. Performance of CStreet, Monocle2, TSCAN, Tempora, SCUBA, PAGA, and CSHMM on the time-series scRNA-seq data during mouse hepatoblast differentiation using the label strategy of directed links (HDTSD 2).**

**(a)** Scatter plot showing the visualization of the UMAP dimensional reduction output of HDTSD 2.

**(b)** The real trajectory of HDTSD 2 used to evaluate the accuracy of all the inferred trajectories.

**(c-i)** The inferred cell state trajectory of HDTSD 2 using CStreet (c), Monocle2 (d), TSCAN (e), Tempora (f), SCUBA (g), PAGA (h), and CSHMM (i). The black dots in (d), (e), and (h) represent the center of cell states and the gray dots in (d) and (e) represent the starts of trajectories. The black edges represent the connections of these centers. The thickness of edges in (h) represent the statistical measure of the connectivity between cell states. In (g), cell types and proportions contained in each cluster was labeled. In (i), each path represents a set of infinite states, each node represents the location where paths split, and each intermediate circle represents a cell state on the path. The circle sizes represent the numbers of cells assigned to the cell state. The cells are colored according to their true state.

**
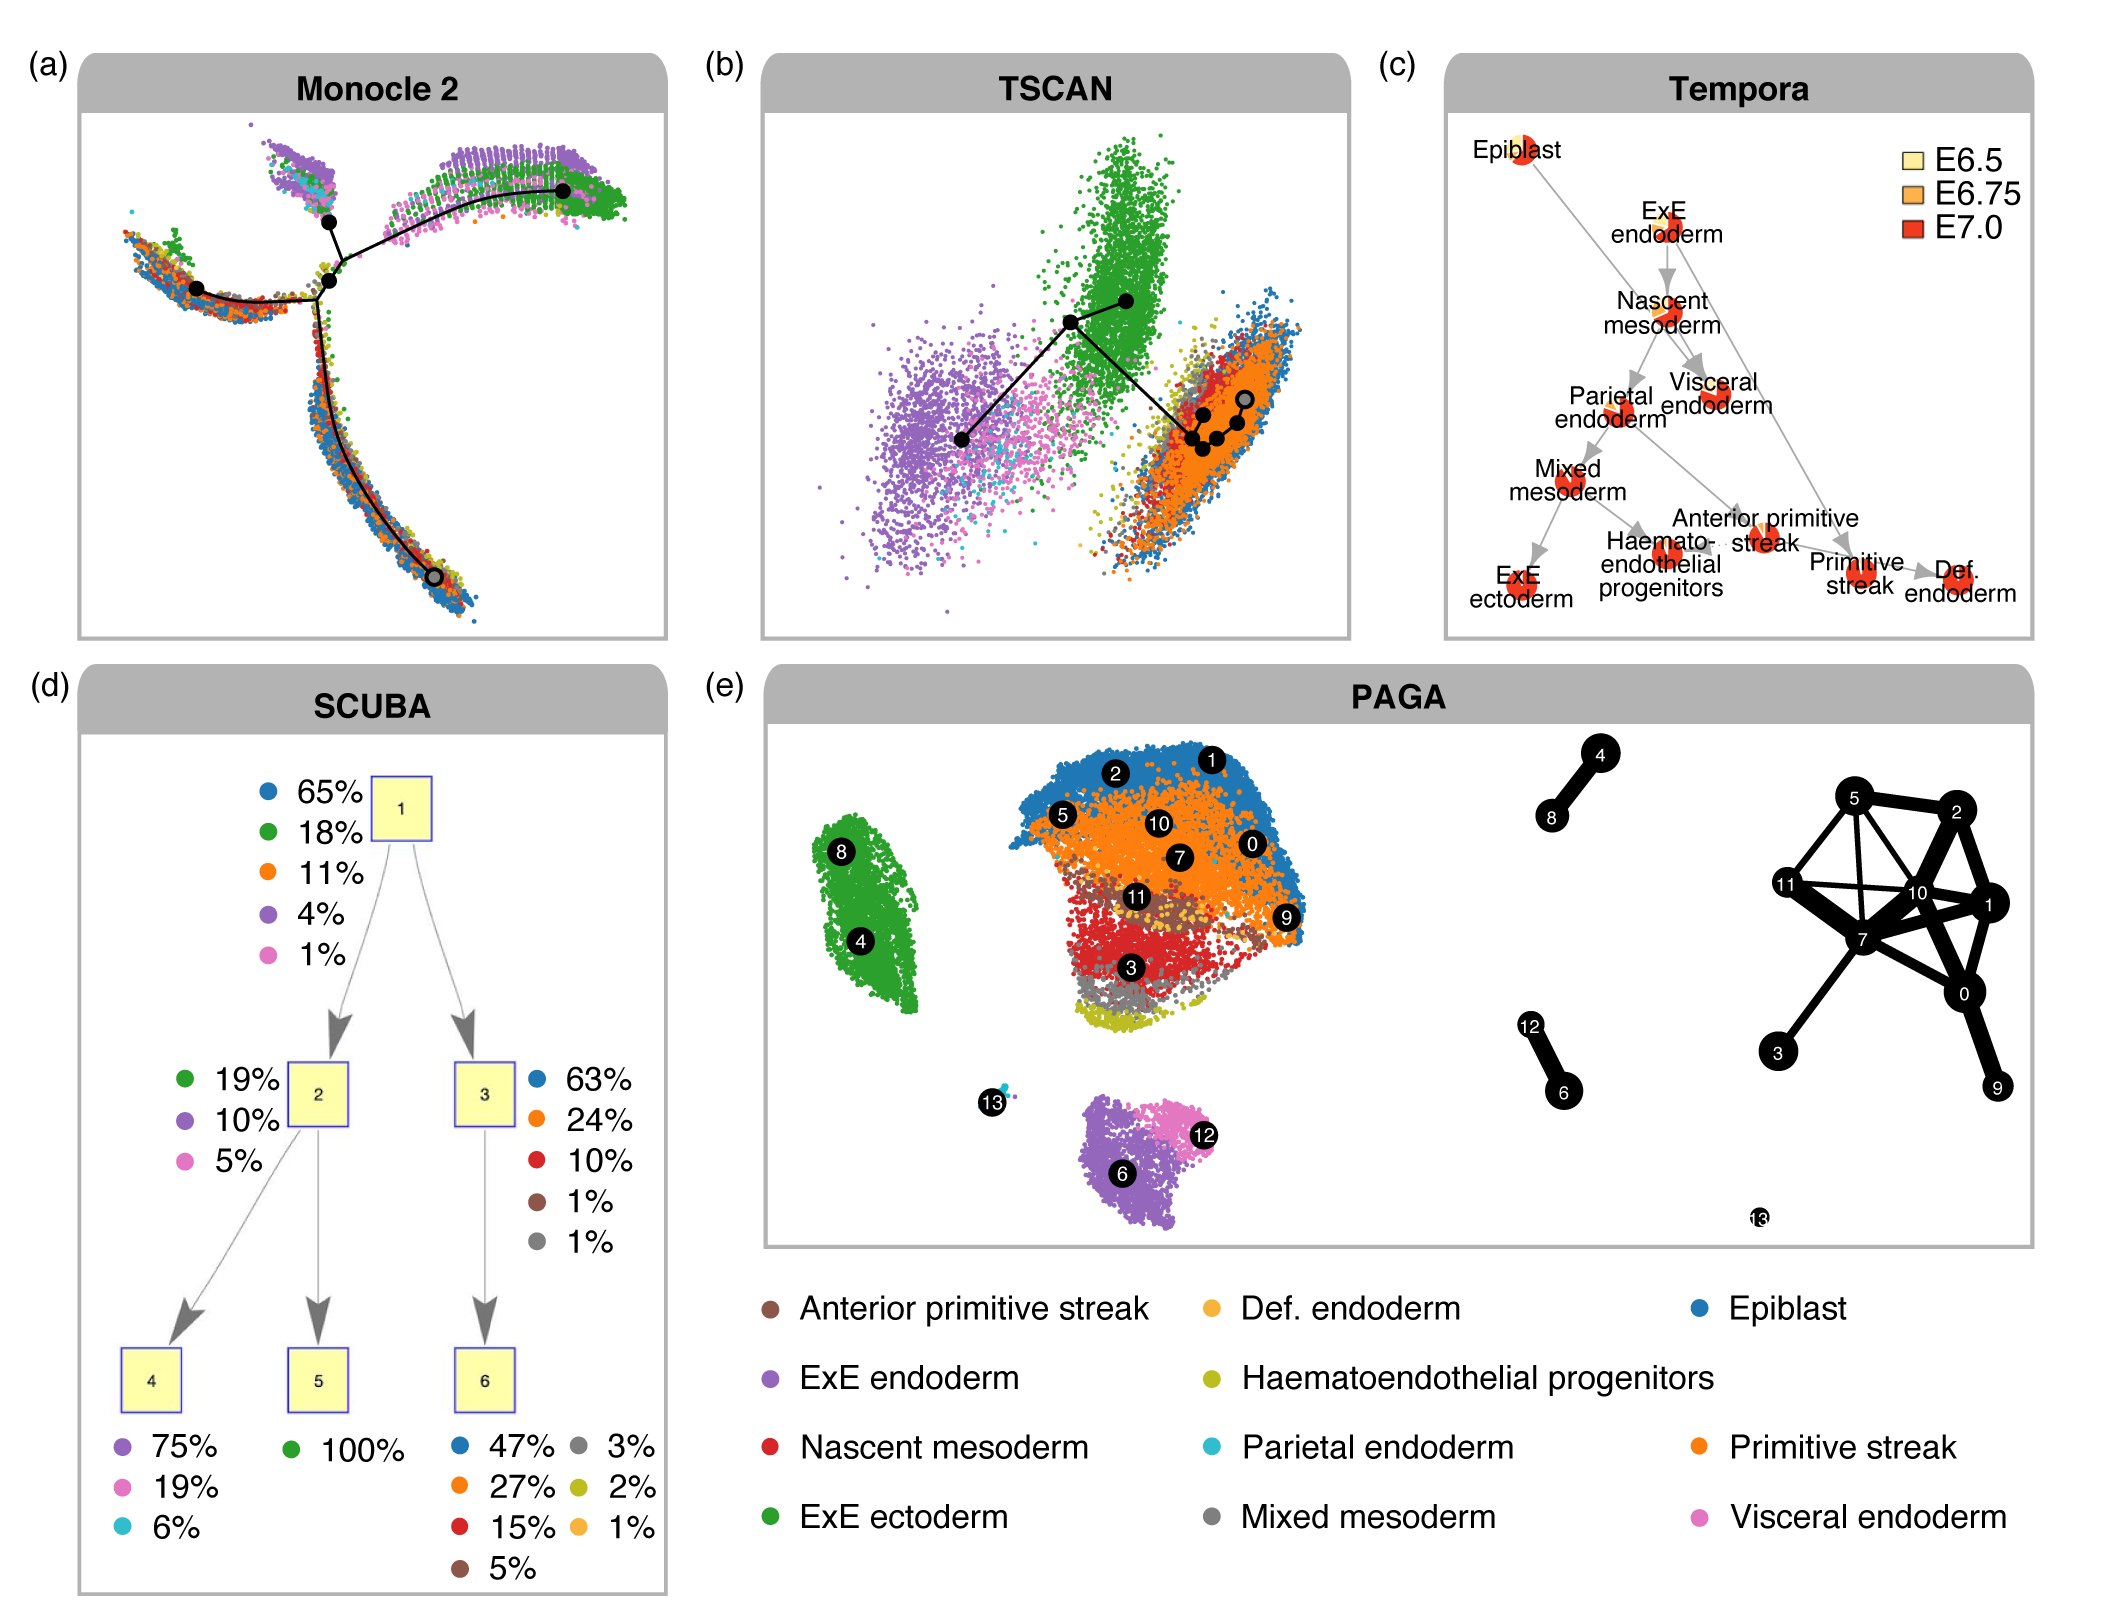
**

**Fig. S5. Performance Monocle2, TSCAN, Tempora, SCUBA, and PAGA on the first three time points of time-series scRNA-seq data during mouse embryogenesis (ETSD 1).**

**(a-f)** The inferred cell state trajectory of ETSD 1 using Monocle2 (a), TSCAN (b), Tempora (c), SCUBA (d), and PAGA (e). The black dots in (a), (b), and (e) represent the center of cell states and the gray dots in (a) and (b) represent the starts of trajectories. The black edges represent the connections of these centers. The thickness of edges in (e) represent the statistical measure of the connectivity between cell states. In (d), cell types and proportions contained in each cluster was labeled. The cells are colored according to their true state. ExE, extraembryonic; Def., definitive.


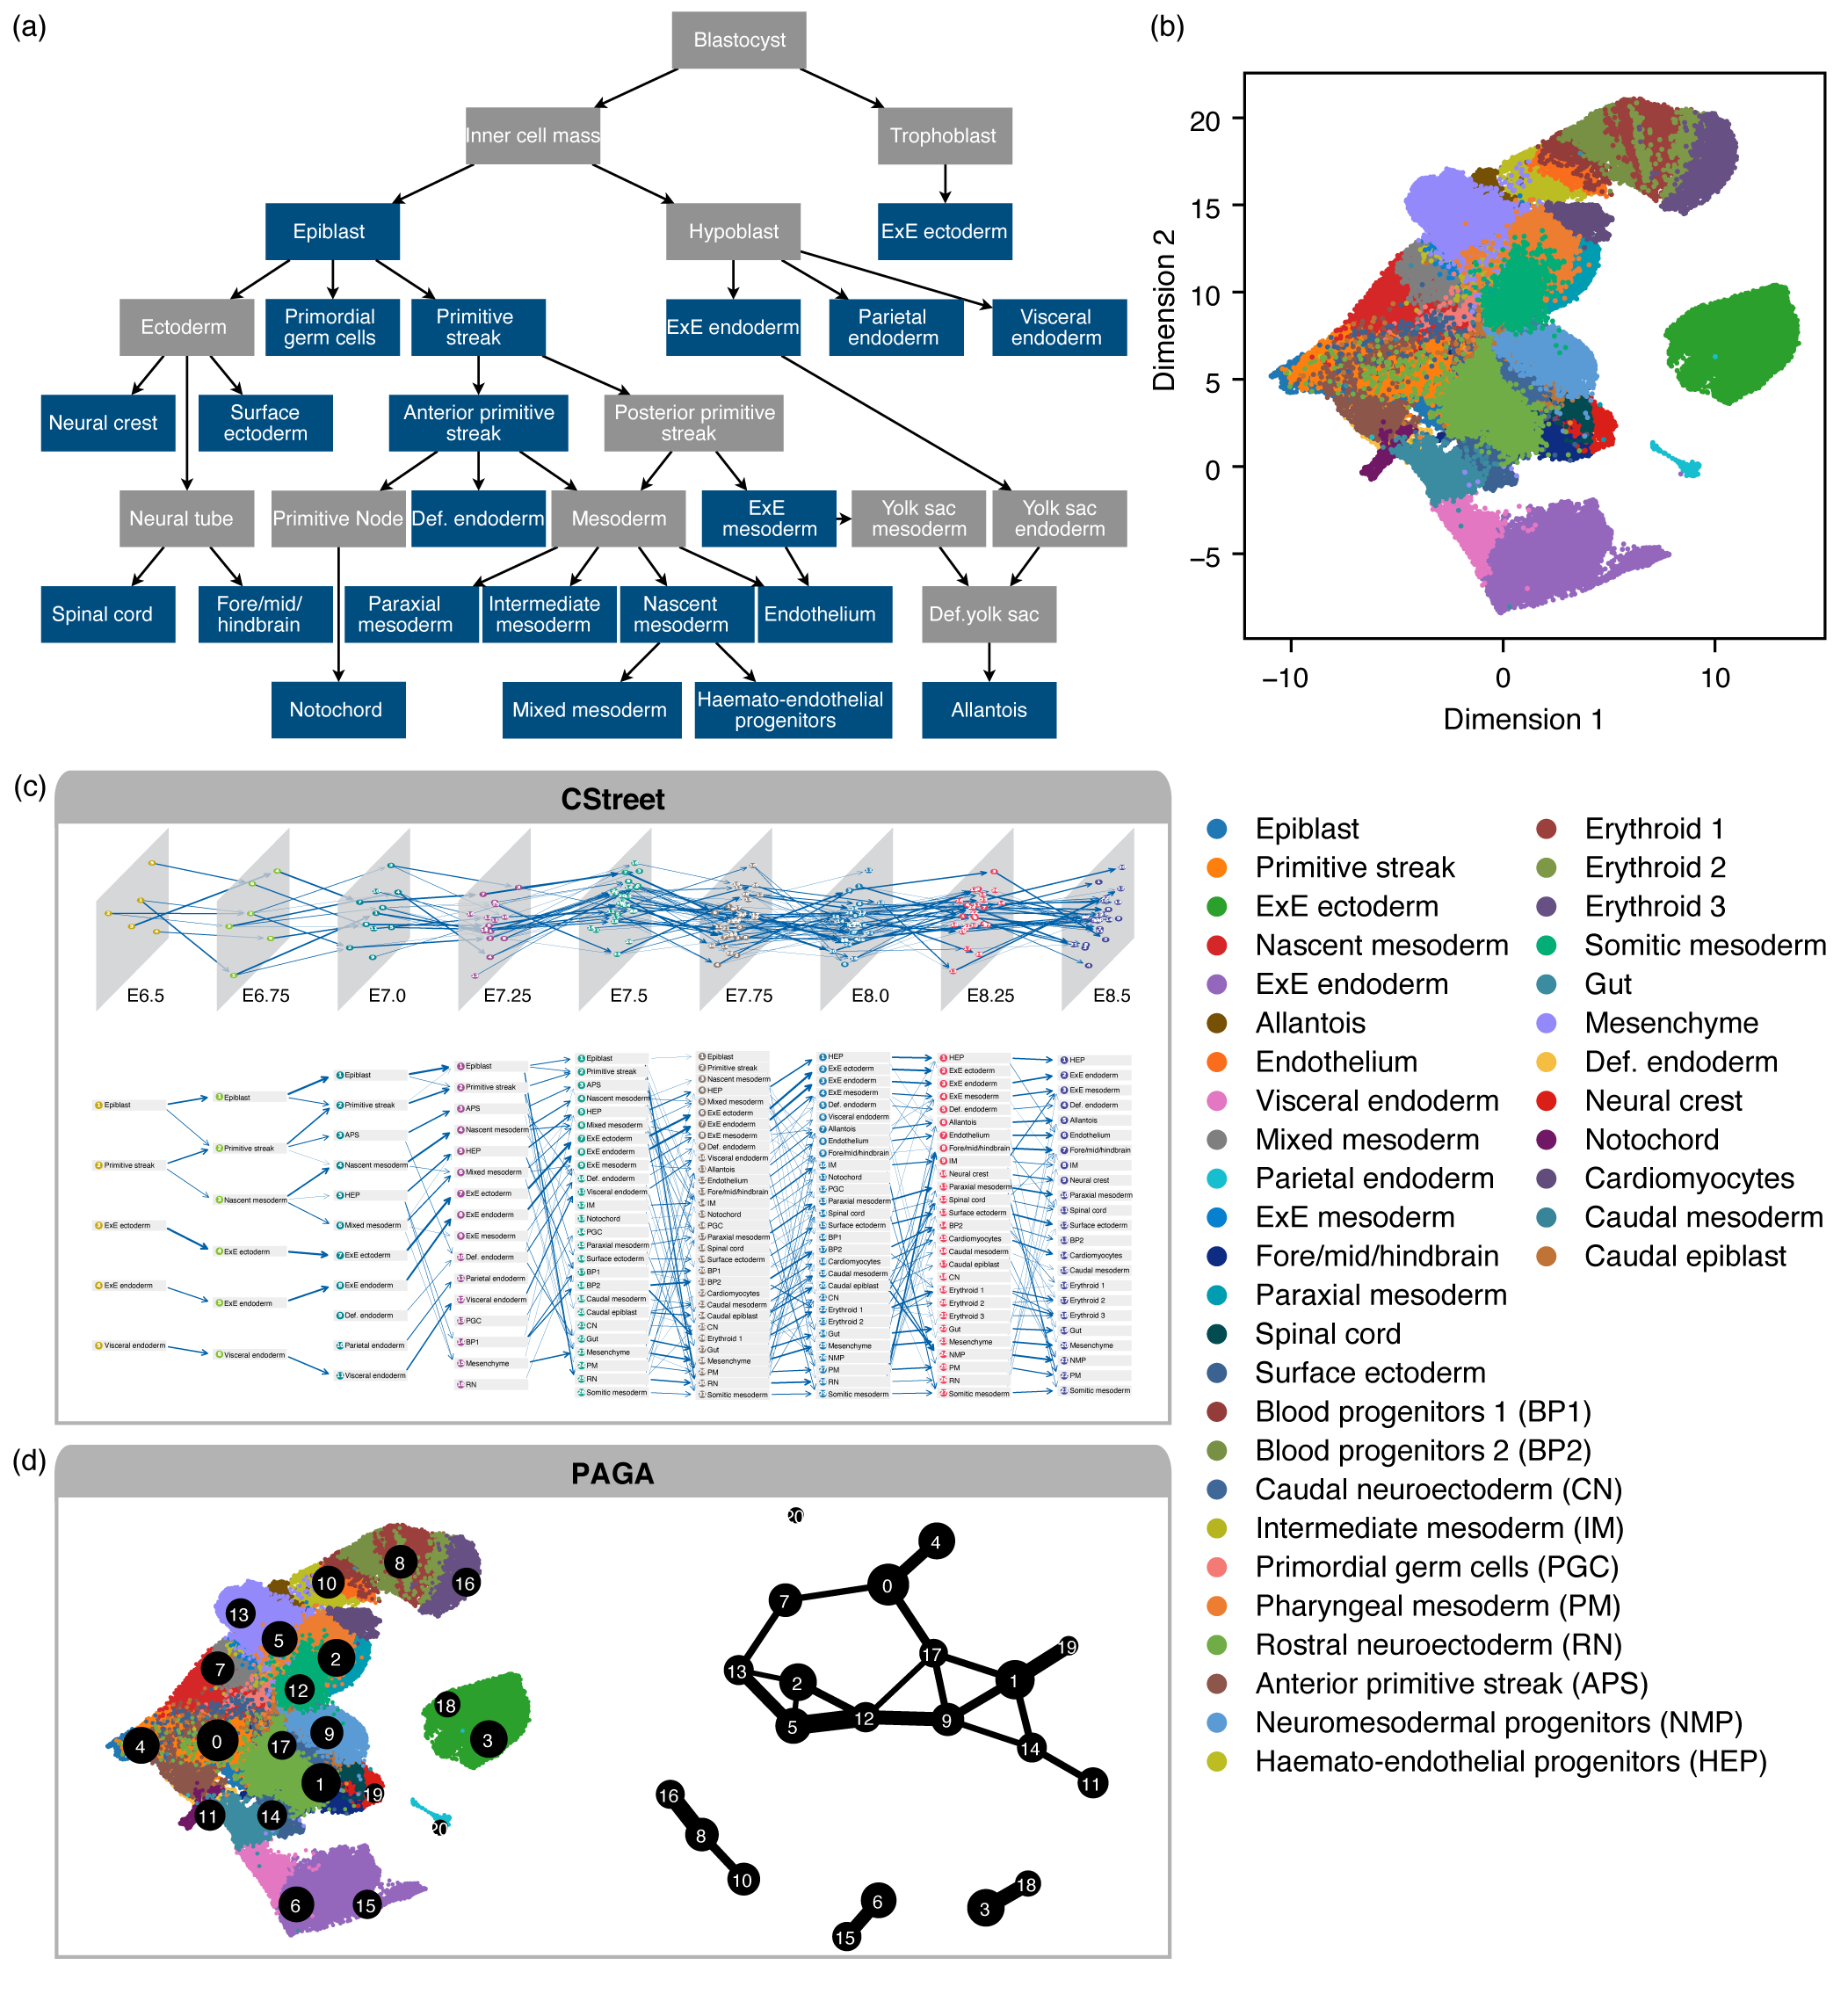


**Fig. S6. Performance of CStreet and PAGA on the nine time points of time-series scRNA-seq data during mouse embryogenesis (ETSD 2).**

**(a)** The real trajectory of ETSD 2 used to evaluate the accuracy of all the inferred trajectories. Blue boxes indicate cell states that are included in this data set, while gray boxes indicate cell states that are not included.

**(b)** Scatter plot showing the visualization of the UMAP dimensional reduction output of ETSD 2.

**(c-d)** The inferred cell state trajectory of ETSD 2 using CStreet (c) and PAGA (d). The black dots in (d) represent the center of cell states. The black edges represent the connections of these centers. The thickness of edges represent the statistical measure of the connectivity between cell states. The cells are colored according to their true state. ExE, extraembryonic; Def., definitive.

**
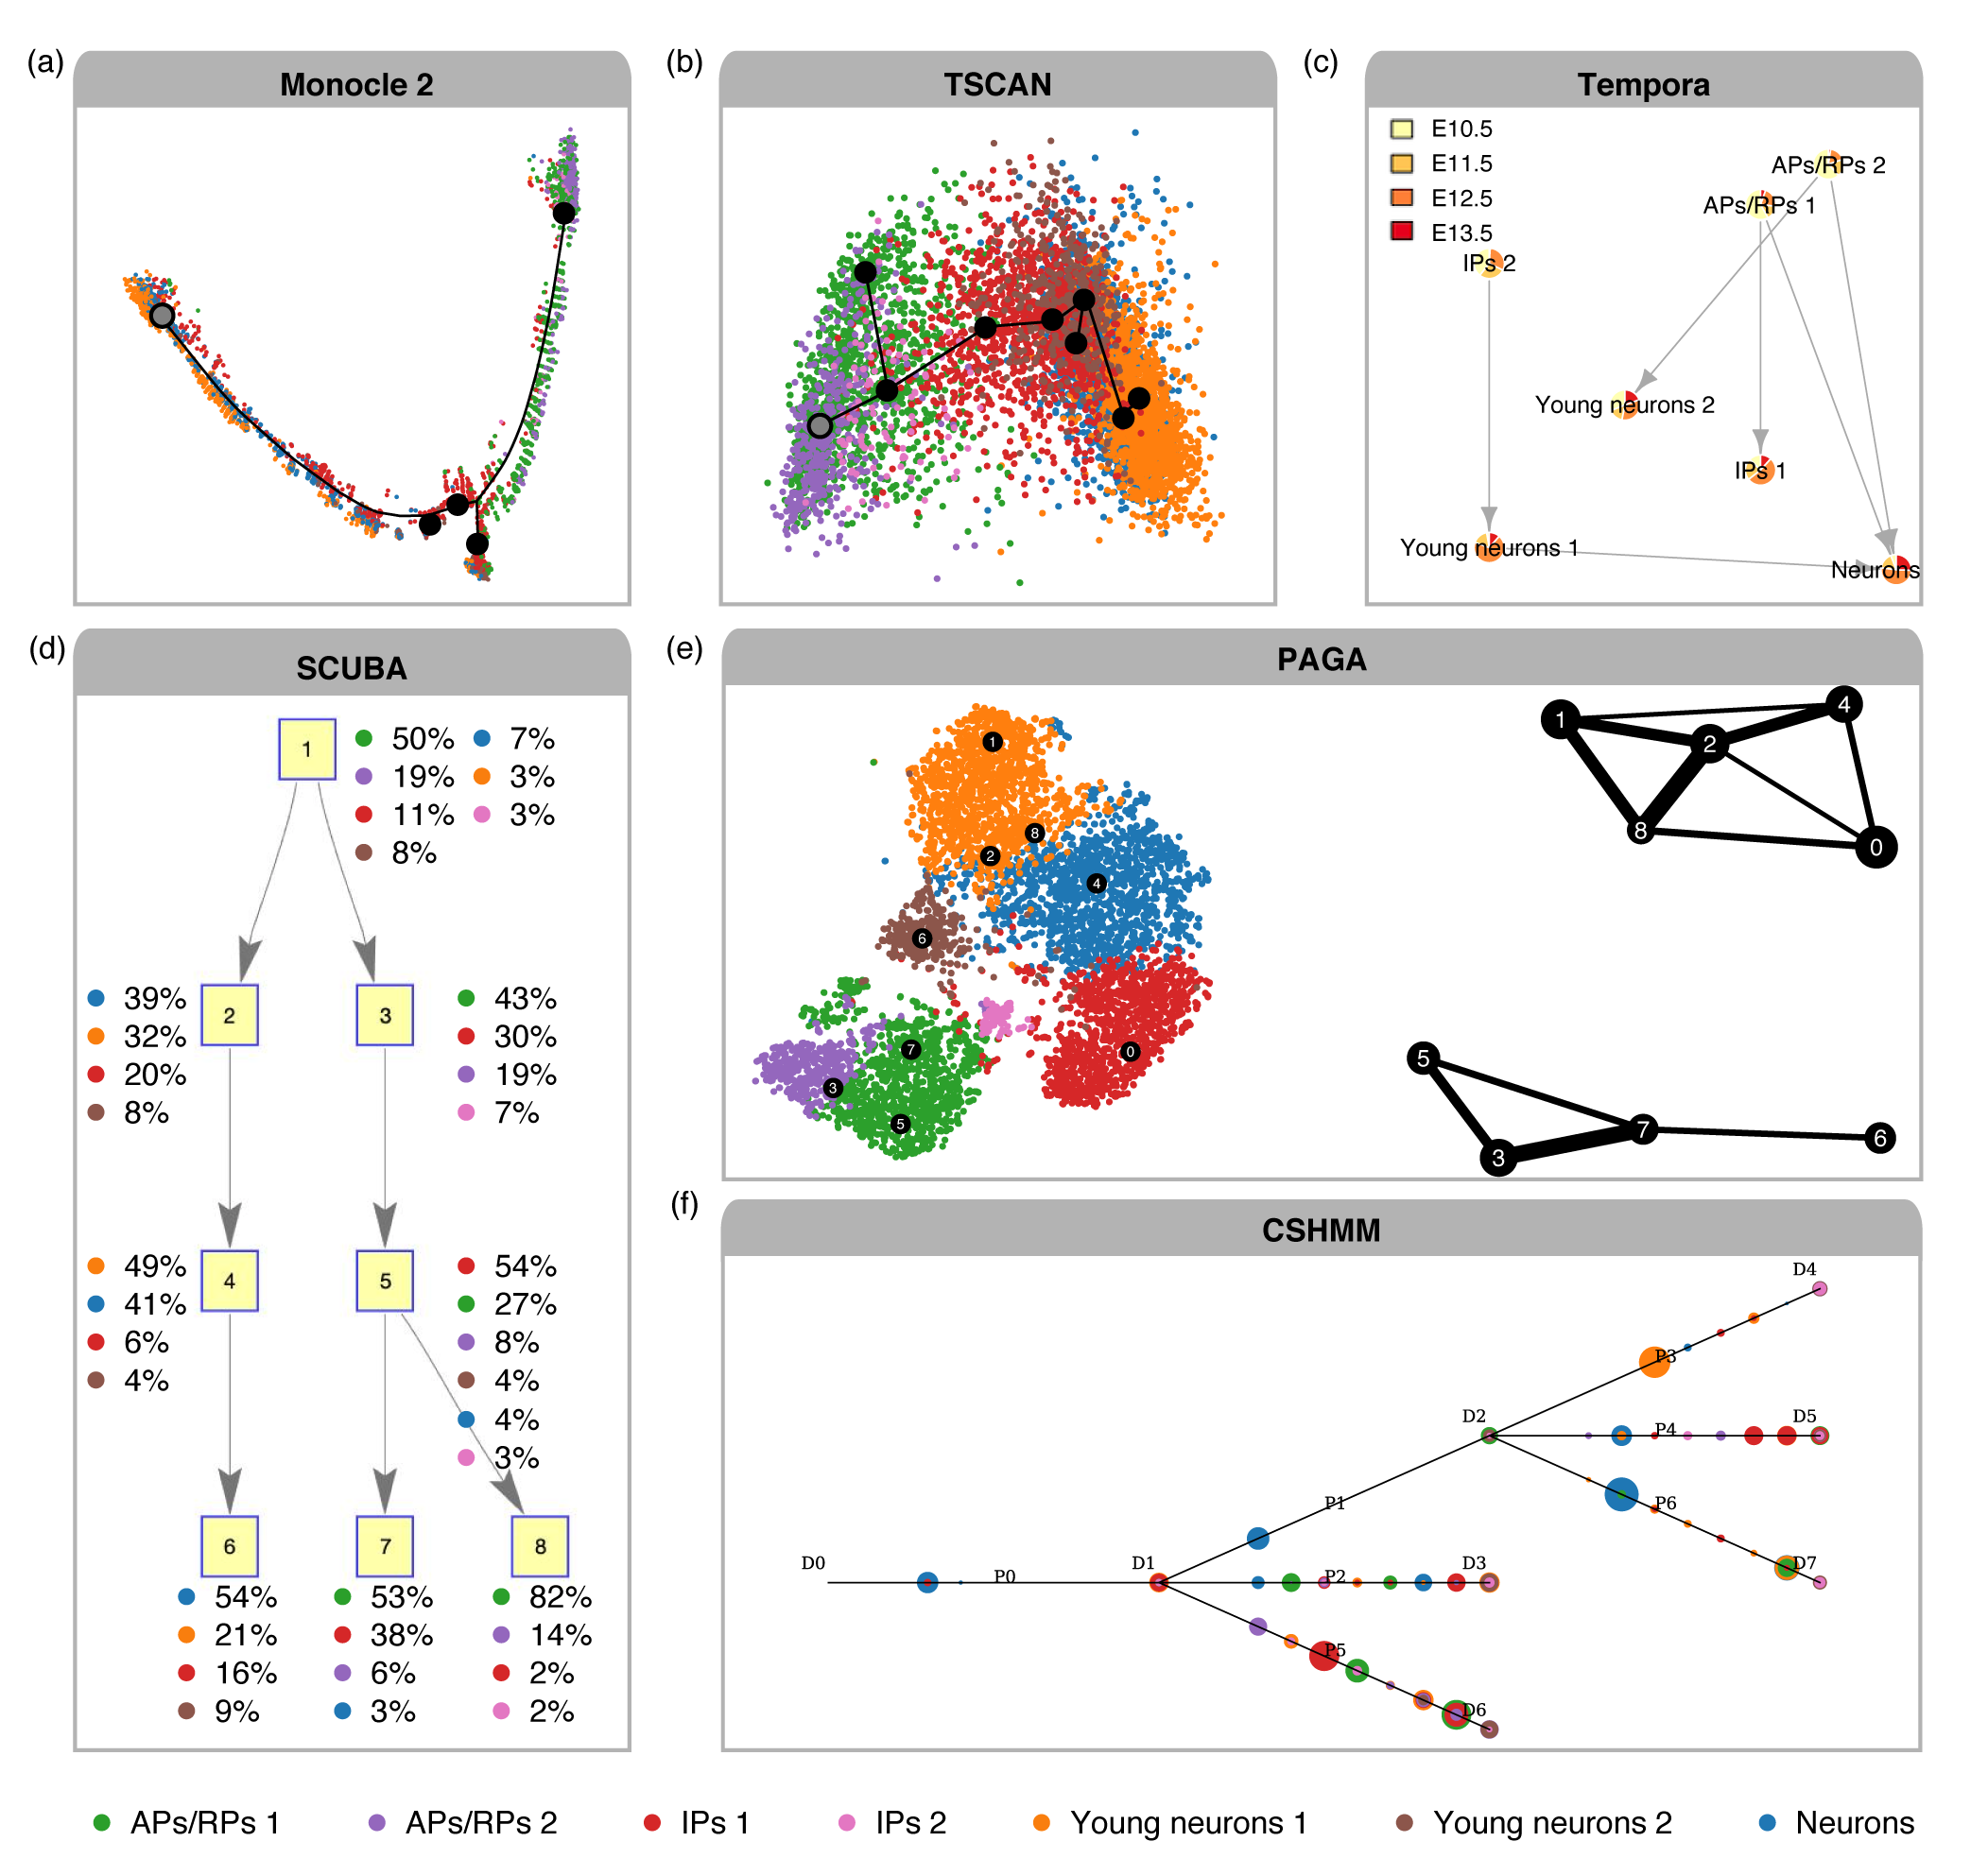
**

**Fig. S7. Performance of Monocle2, TSCAN, Tempora, SCUBA, PAGA, and CSHMM on the time-series scRNA-seq data during the embryonic murine cerebral cortex development (CCTSD).**

**(a-f)** The inferred cell state trajectory of CCTSD using Monocle2 (a), TSCAN (b), Tempora (c), SCUBA (d), PAGA (e), and CSHMM (f). The black dots in (a), (b), and (e) represent the center of cell states and the gray dots in (a) and (b) represent the starts of trajectories. The black edges represent the connections of these centers. The thickness of edges in (e) represent the statistical measure of the connectivity between cell states. In (d), cell types and proportions contained in each cluster was labeled. In (f), each path represents a set of infinite states, each node represents the location where paths split, and each intermediate circle represents a cell state on the path. The circle sizes represent the numbers of cells assigned to the cell state. The cells are colored according to their true state. APs/RPs, apical precursors and radial precursors; IPs, intermediate progenitors.
