# Supplementary figures and images for: CStreet: a computed Cell State trajectory inference method for time-series single-cell RNA sequencing data
Source: Oxford University Press journal article supplement (doi:10.1093/bioinformatics/btab488), 2021-06-30

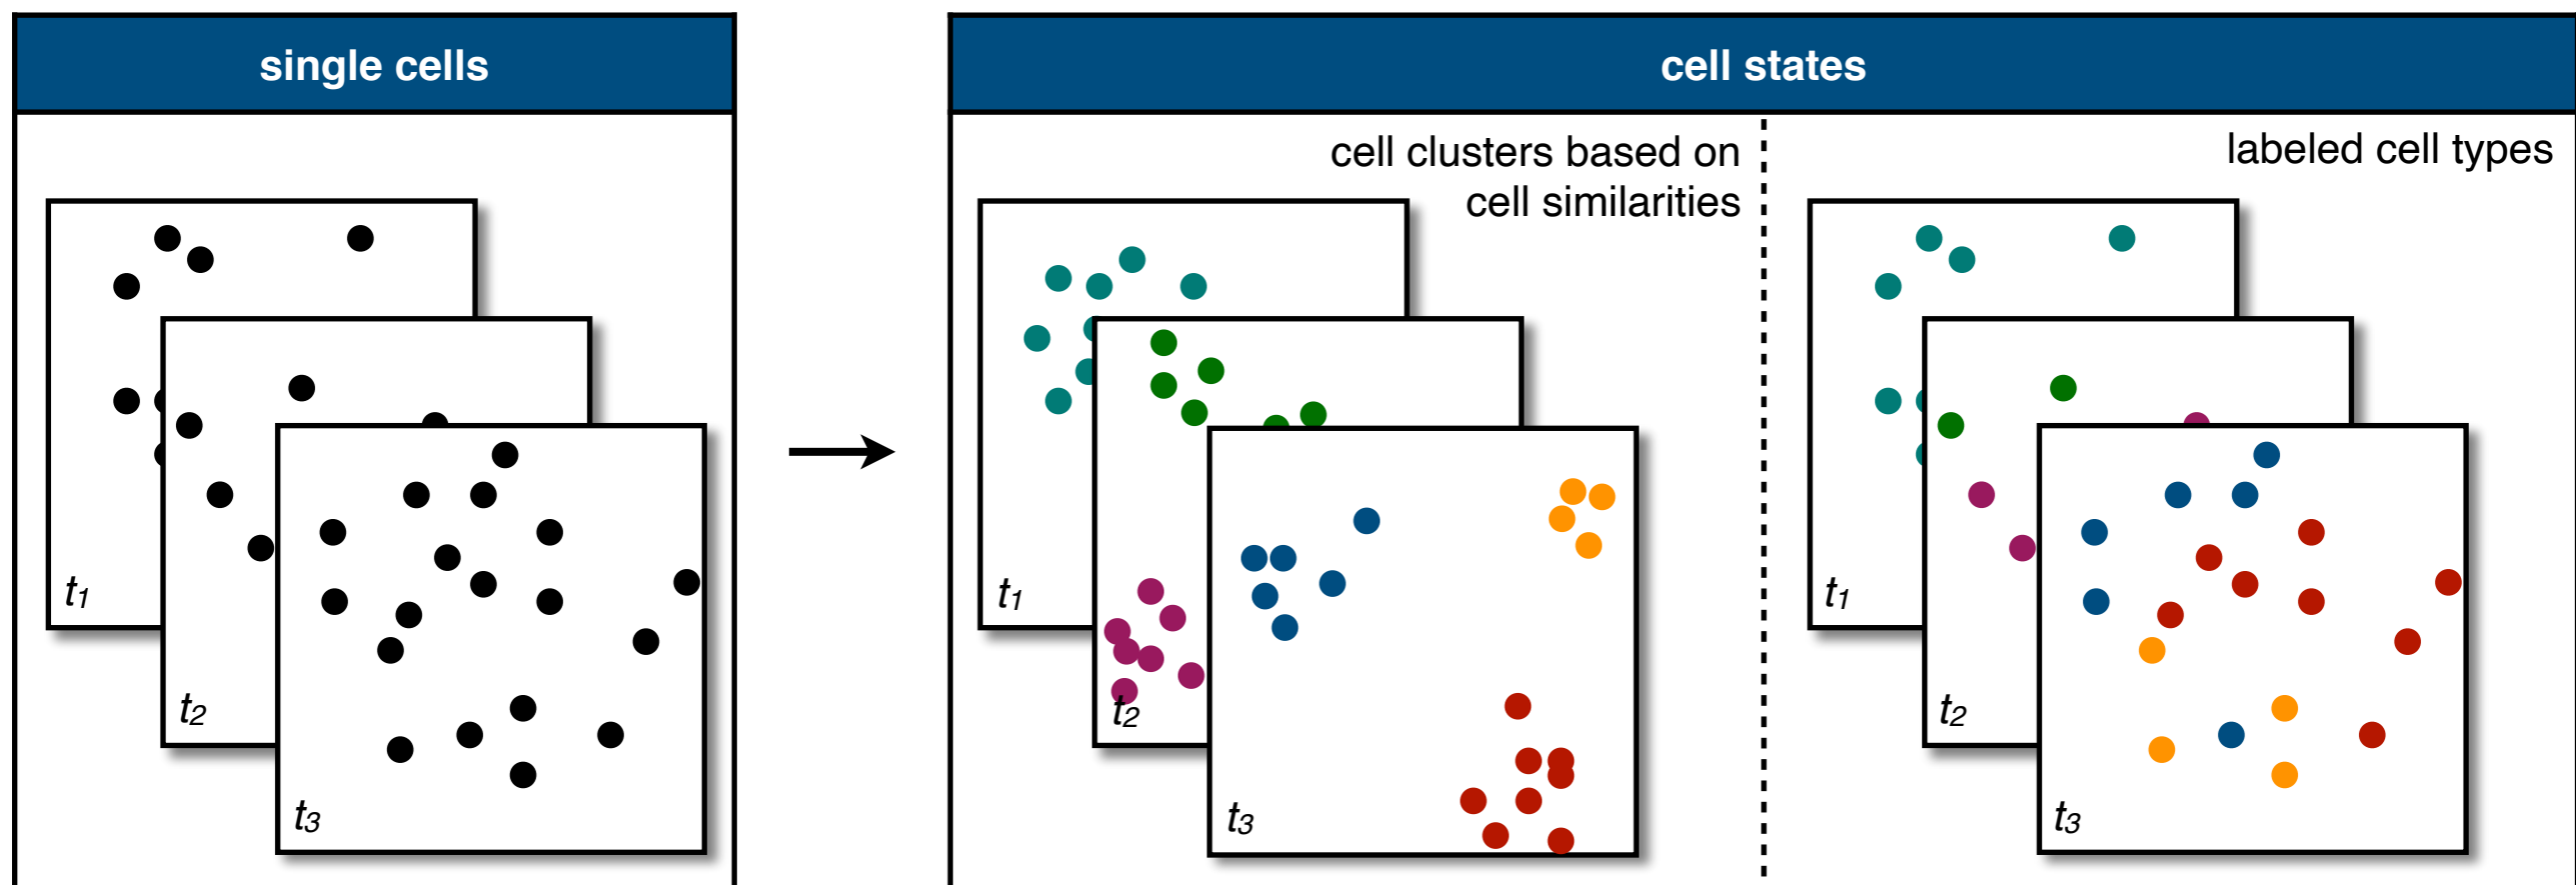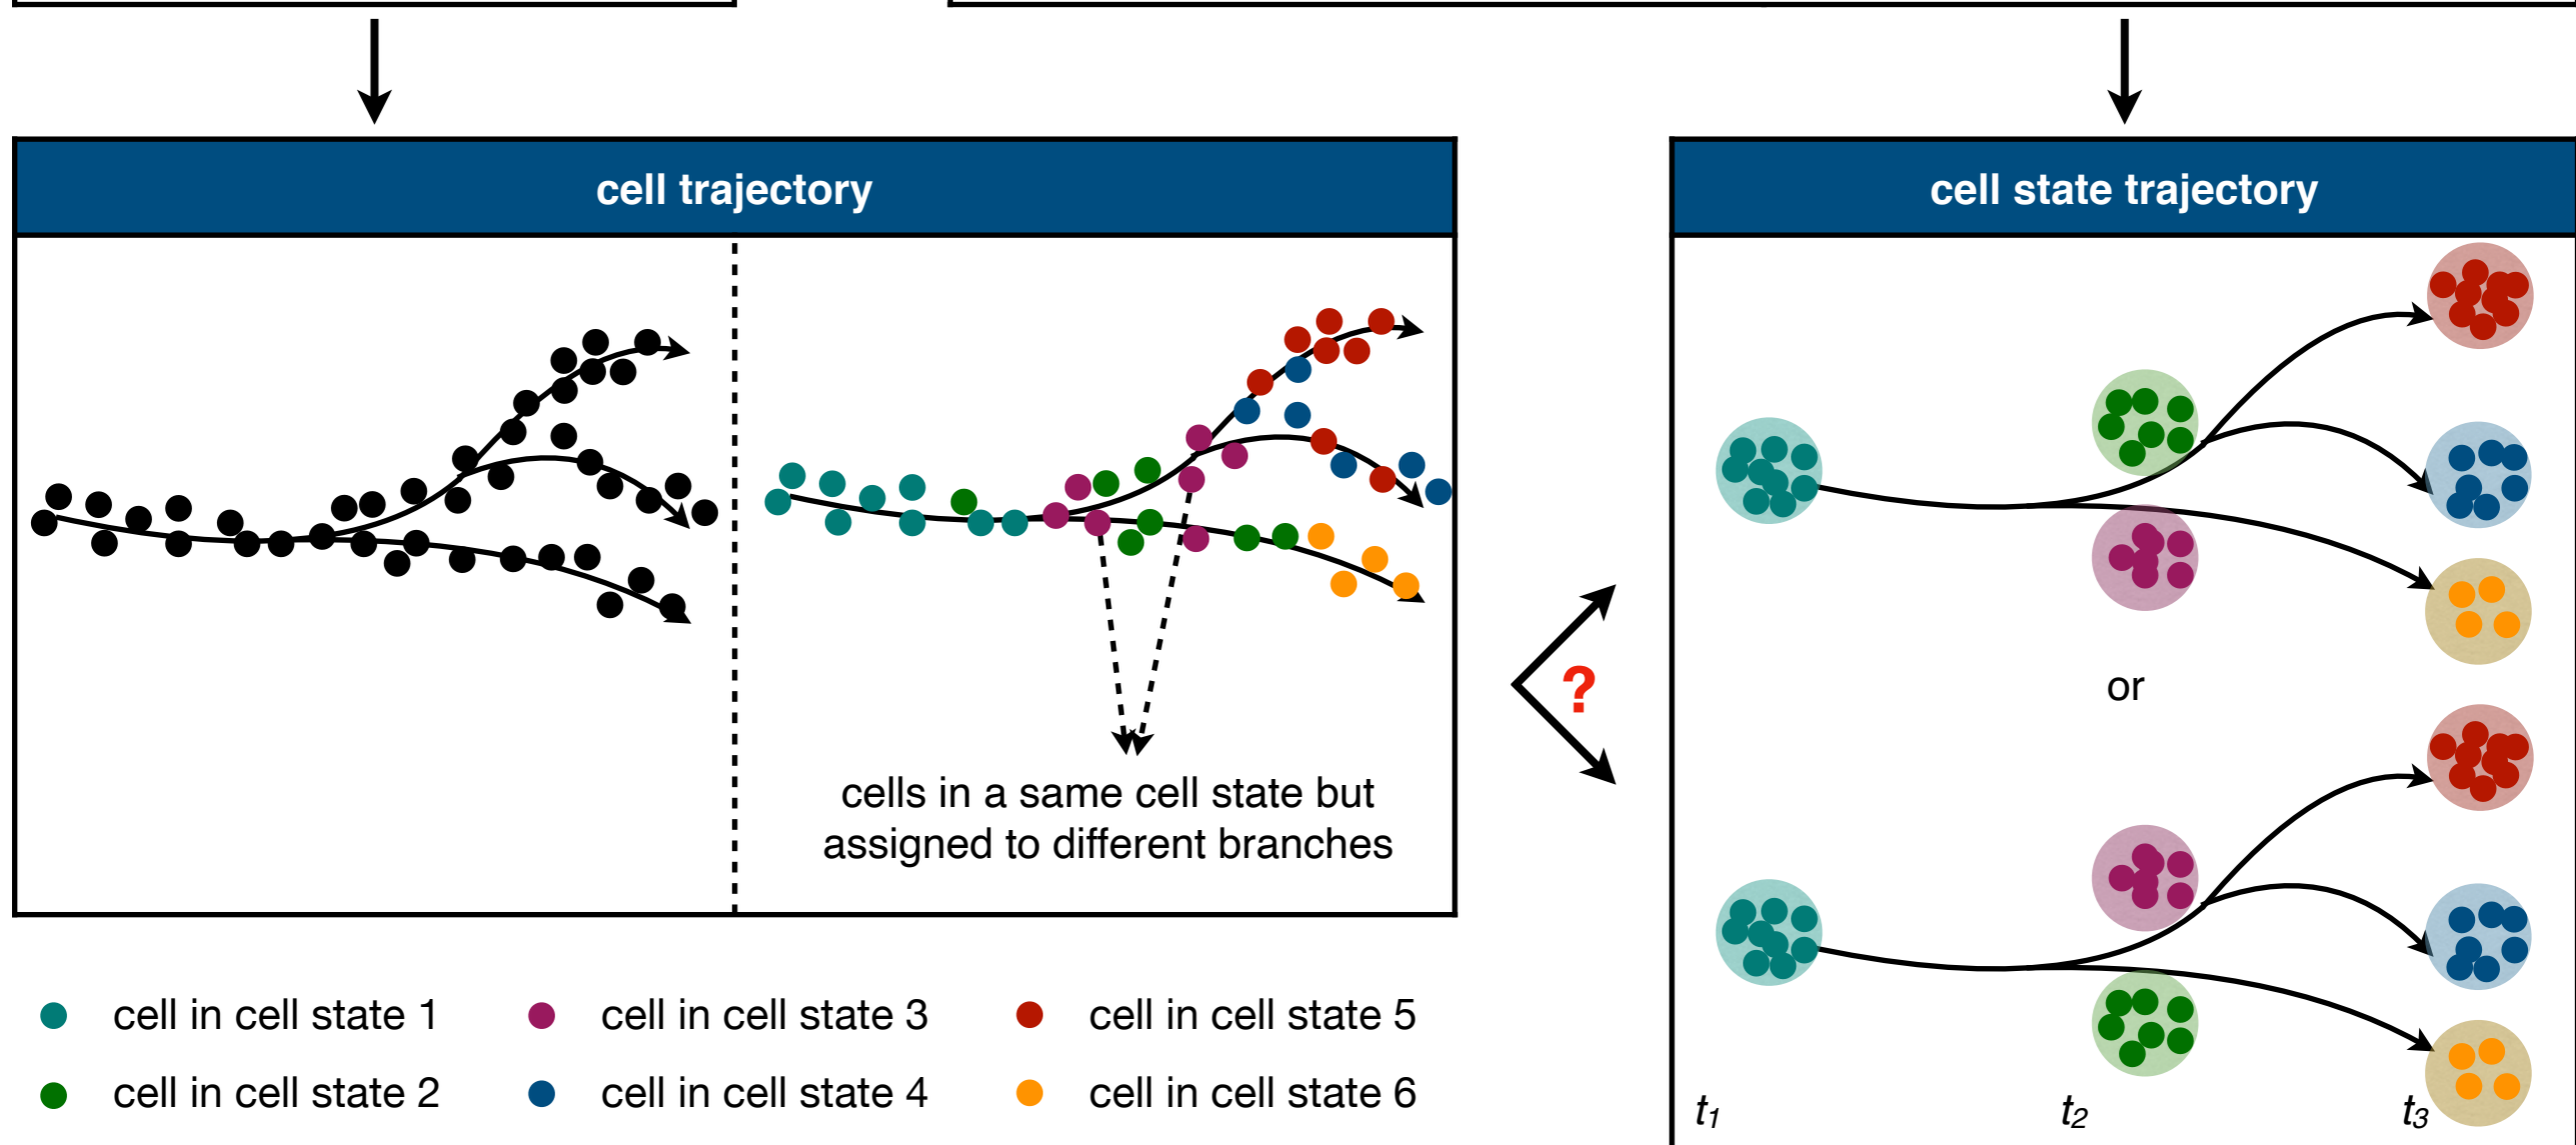

Supplement: btab488_supplementary_data.zip [file btab488_supplementary_data.zip › FigS1.pdf]

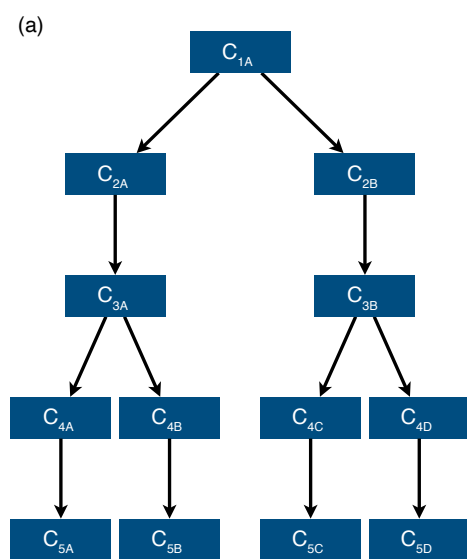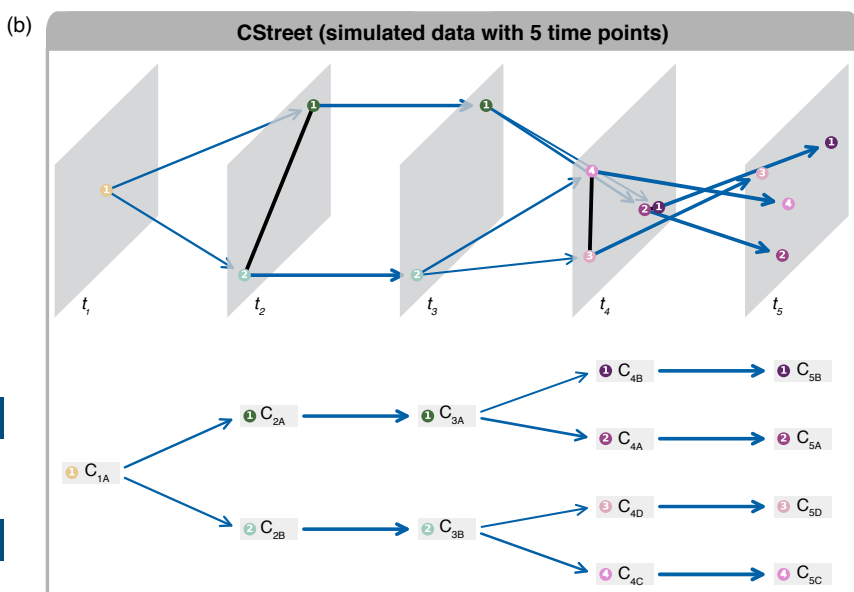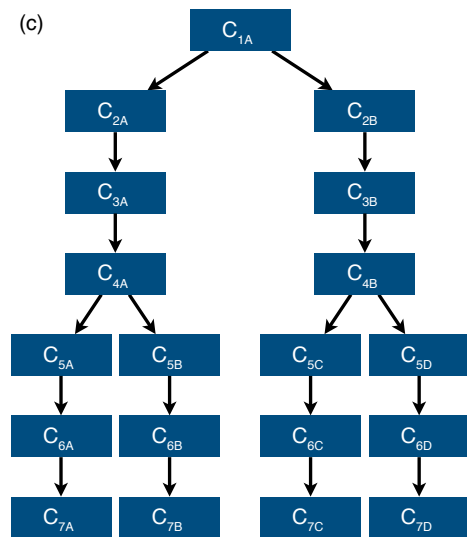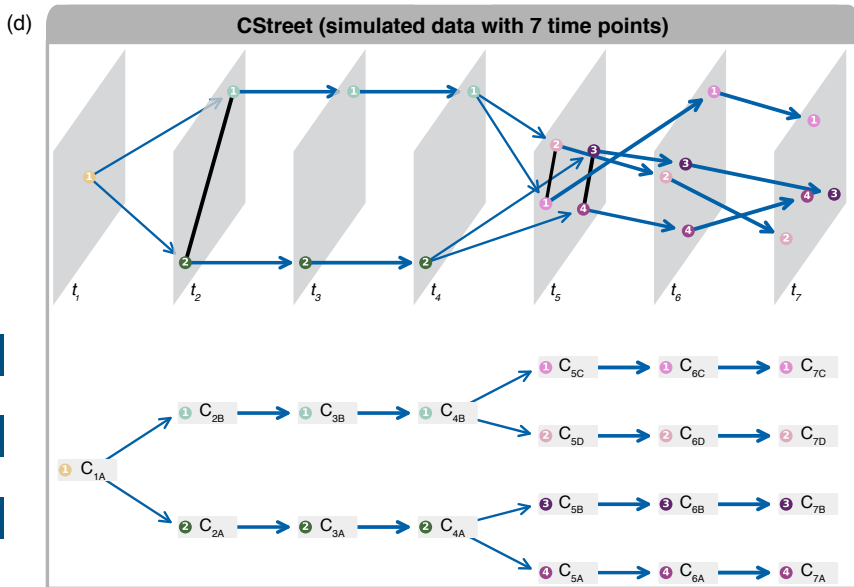

Supplement: btab488_supplementary_data.zip [file btab488_supplementary_data.zip › FigS2.pdf]

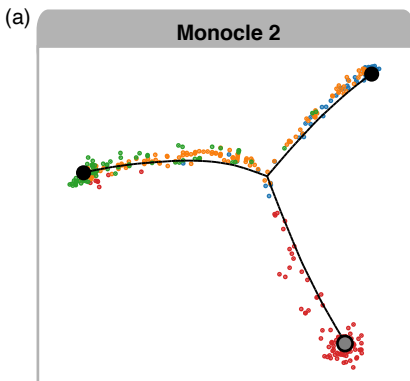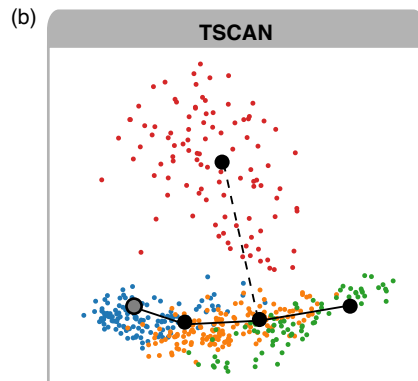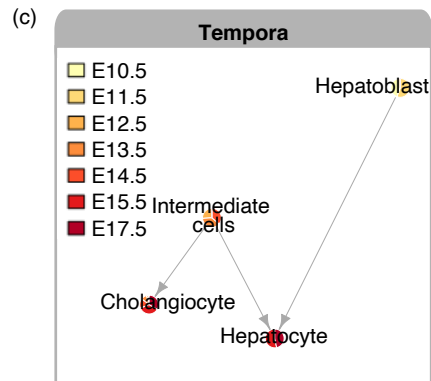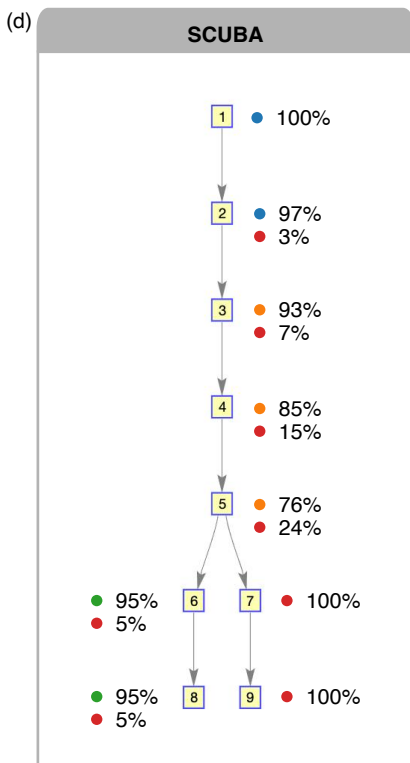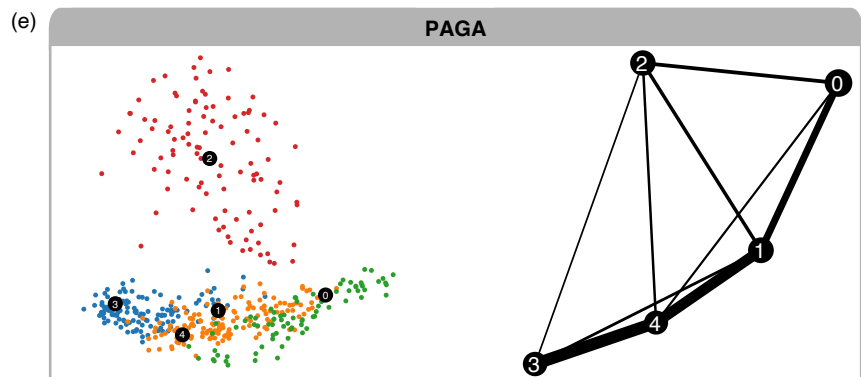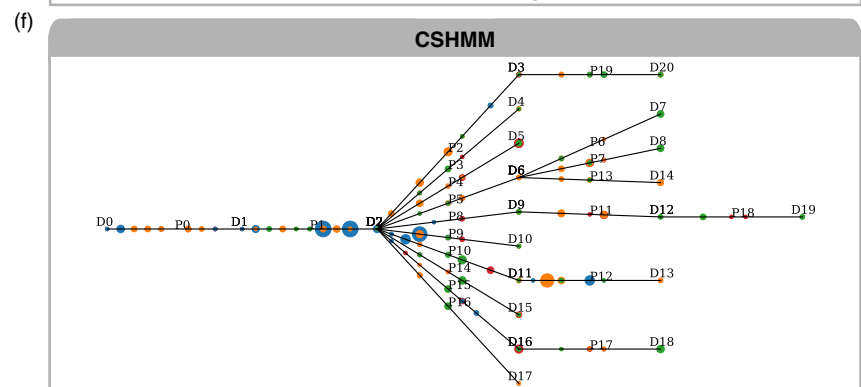

● Hepatoblast

● Intermediate cells

● Hepatocyte

● Cholangiocyte

Supplement: btab488_supplementary_data.zip [file btab488_supplementary_data.zip › FigS3.pdf]

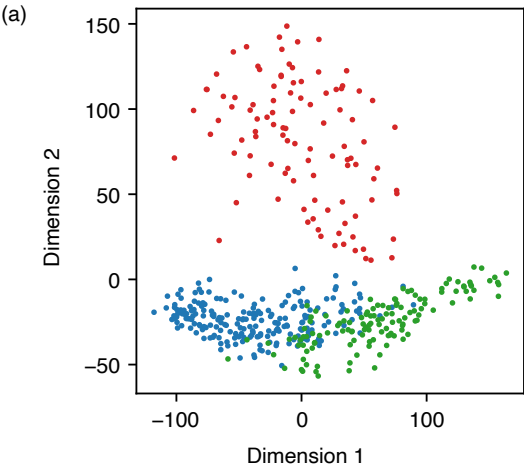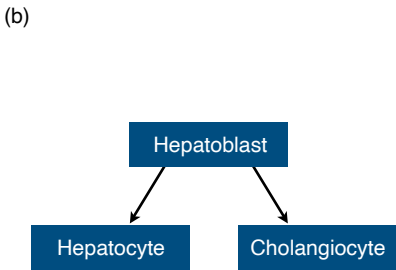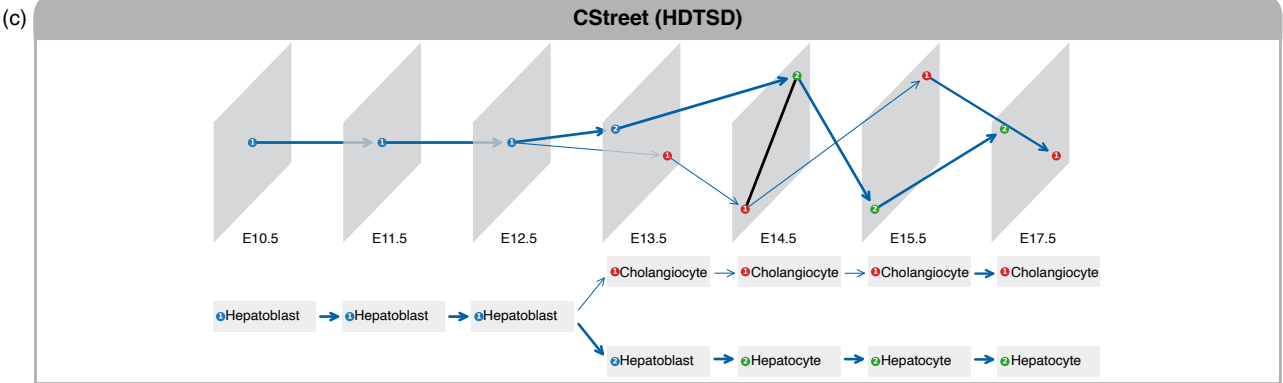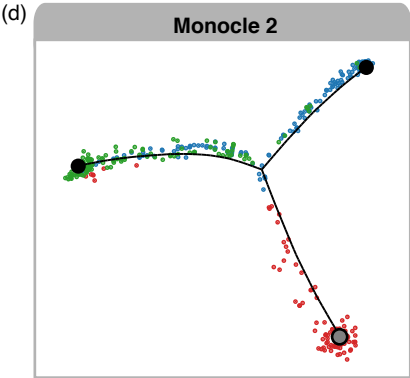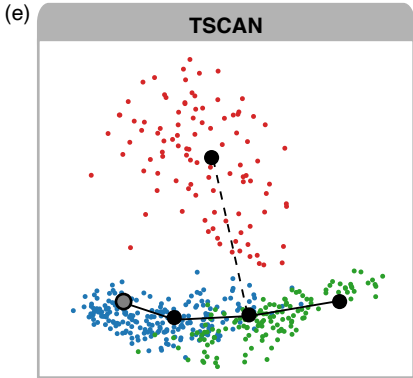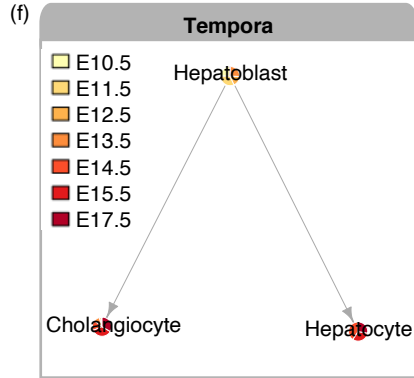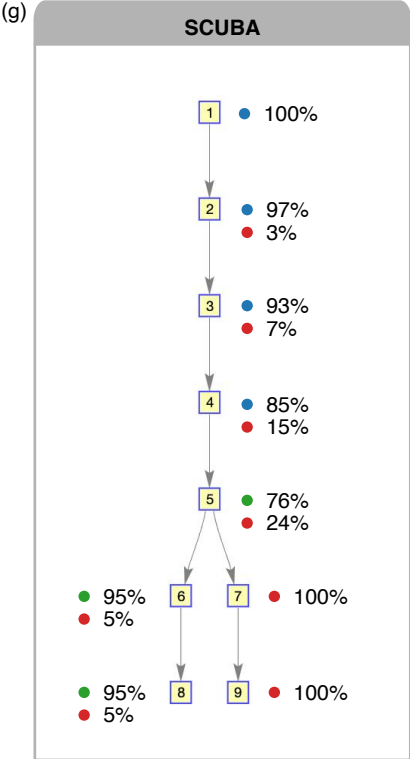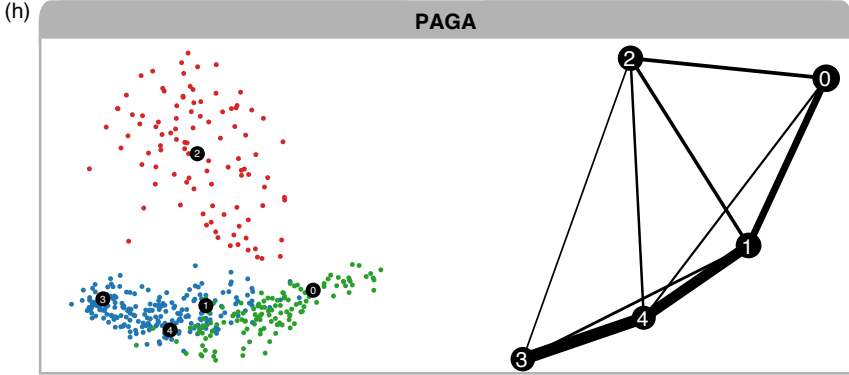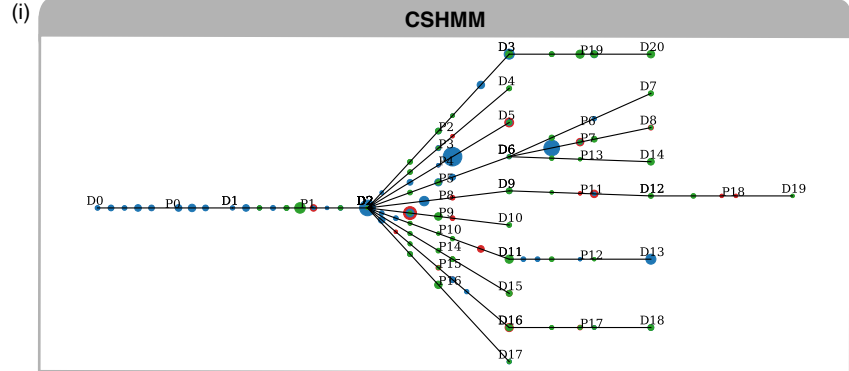

Supplement: btab488_supplementary_data.zip [file btab488_supplementary_data.zip › FigS4.pdf]

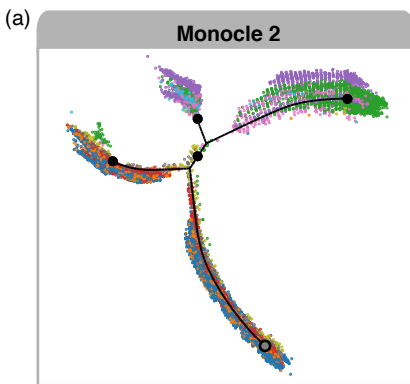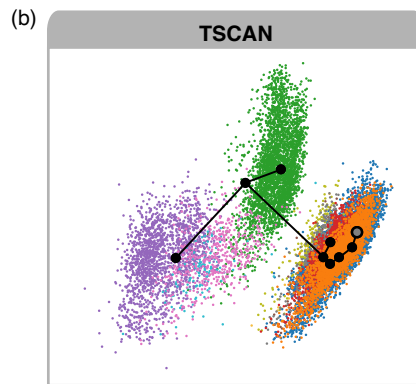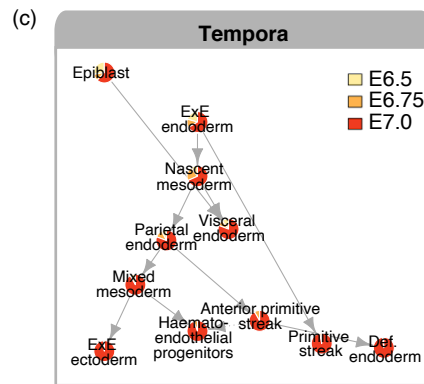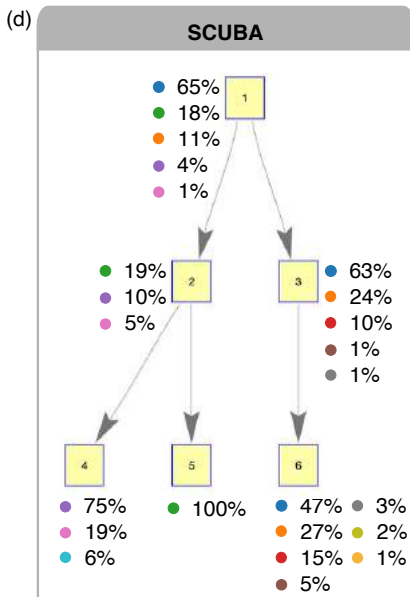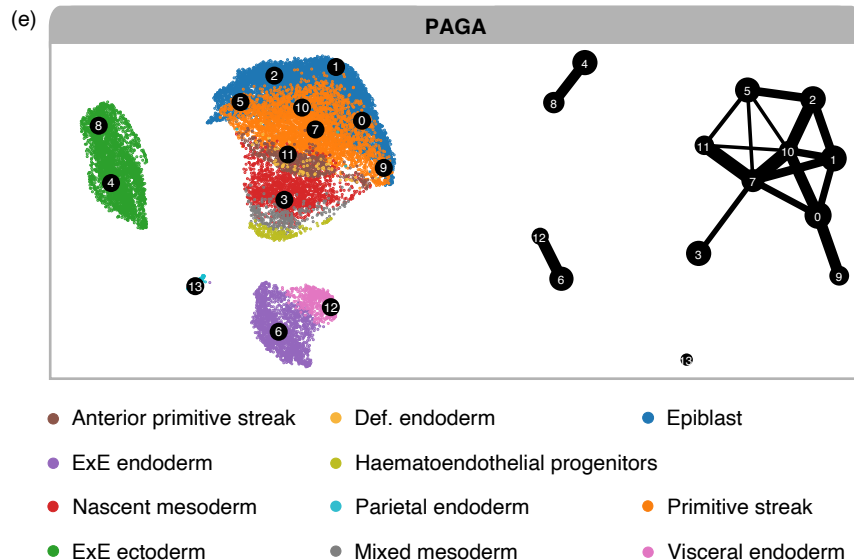

Supplement: btab488_supplementary_data.zip [file btab488_supplementary_data.zip › FigS5.pdf]

(a)

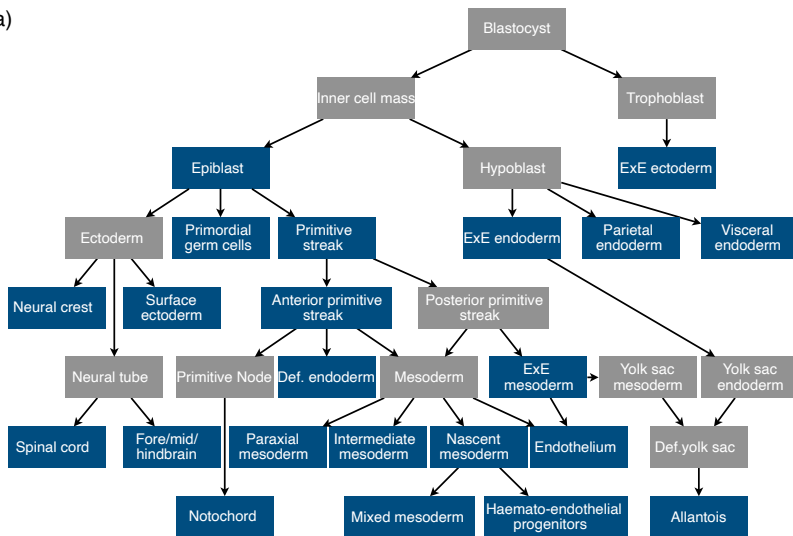

(b)

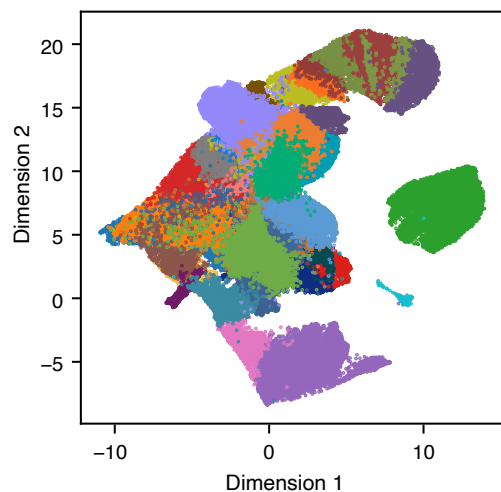

(c)

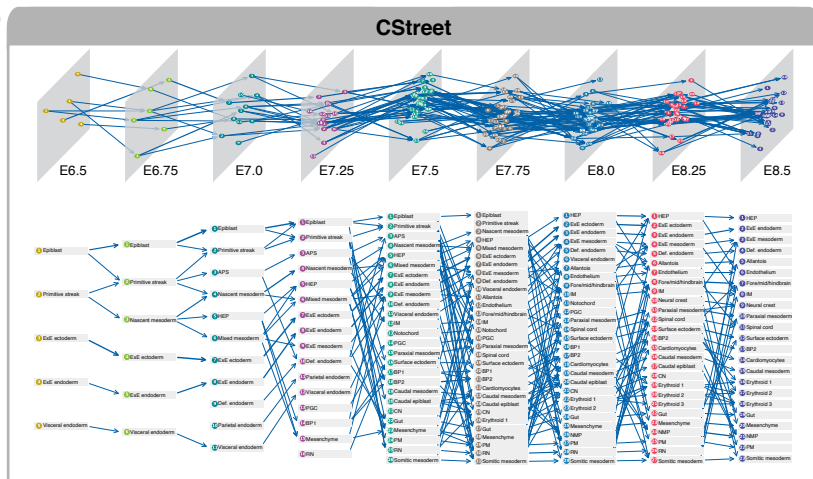

(d)

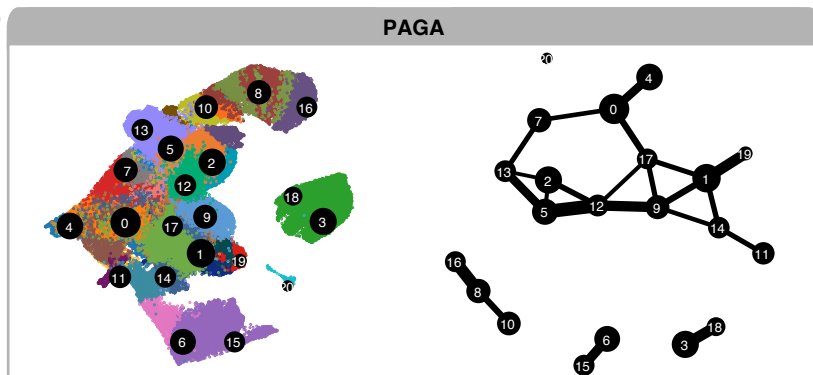

Supplement: btab488_supplementary_data.zip [file btab488_supplementary_data.zip › FigS6.pdf]

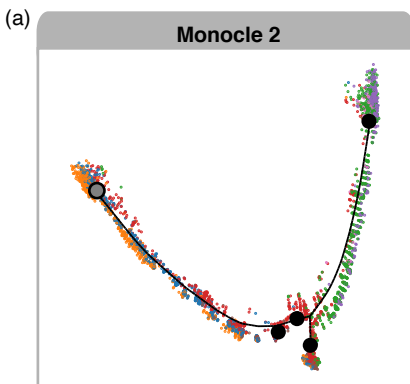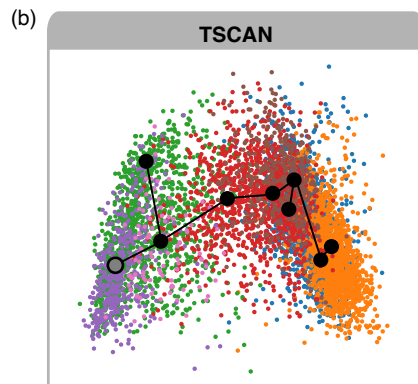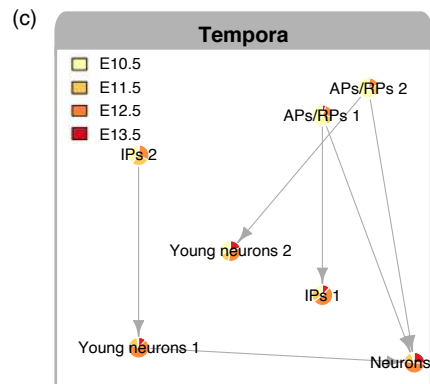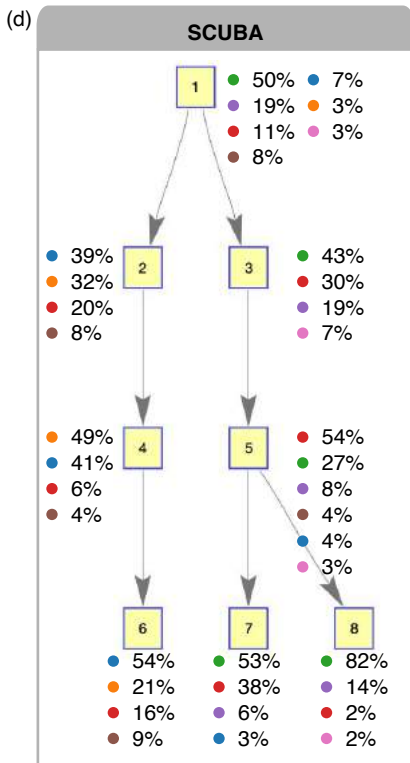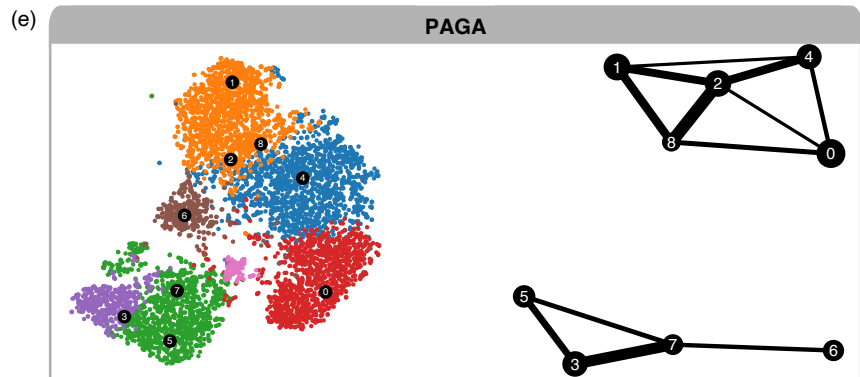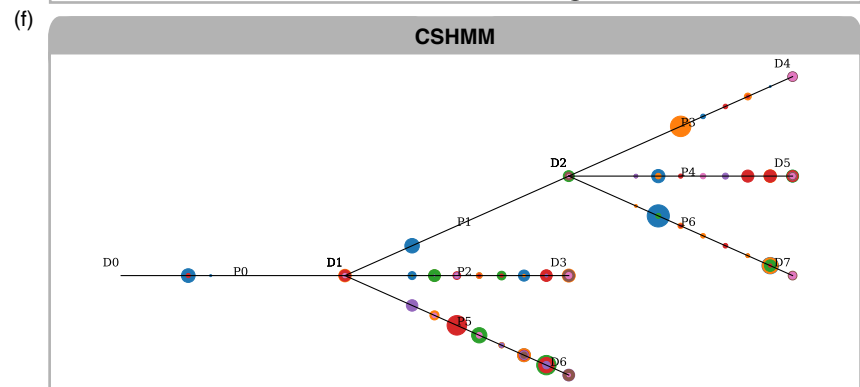

● APs/RPs 1 ● APs/RPs 2 ● IPs 1 ● IPs 2 ● Young neurons 1 ● Young neurons 2 ● Neurons

Supplement: btab488_supplementary_data.zip [file btab488_supplementary_data.zip › FigS7.pdf]
